# Supplementary material for: Protein phosphatase 1 in association with Bud14 inhibits mitotic exit in Saccharomyces cerevisiae
Source: PubMed Central journal article supplement (PMC8577847; doi:10.7554/elife.72833), 2021-10-11

# Figure 7 - Figure Supplement 2B-Source Data 1

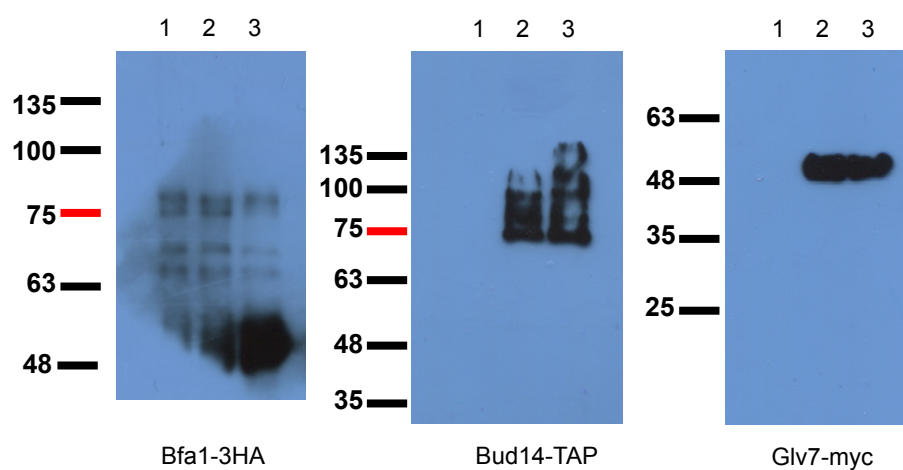

Supplement: elife-72833-fig7-figsupp2-data1.pdf [file elife-72833-fig7-figsupp2-data1.pdf]
