# Supplementary material for: Protein phosphatase 1 in association with Bud14 inhibits mitotic exit in Saccharomyces cerevisiae
Source: eLife journal article supplement (doi:10.7554/elife.72833), 2021-10-11

# Figure 3 - Figure Supplement 1A-Source Data 1

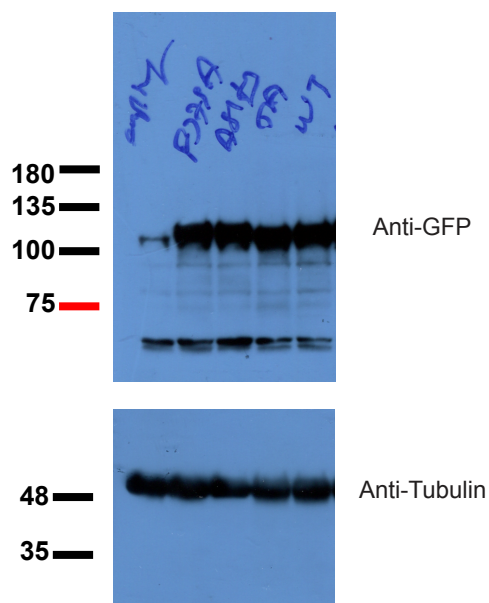

Supplement: fig3-figsupp1-data1 [file elife-72833-fig3-figsupp1-data1-v2.pdf]
