# Supplementary material for: Protein phosphatase 1 in association with Bud14 inhibits mitotic exit in Saccharomyces cerevisiae
Source: eLife. 2021 Oct 11;10:e72833. doi: 10.7554/eLife.72833 (PMC8577847; doi:10.7554/eLife.72833)
Supplement: Figure 2—figure supplement 1—source data 1. [file elife-72833-fig2-figsupp1-data1.xlsx]

## Sheet: Sheet2
	GPY1033
	Experiment 1	Experiment 2	Experiment 3
%cells with mother cortex localization	79.3636	74.183	77.4346
% cells with SPB localization	87.75	90.1771	73.7753
	DGY004
	Experiment 1	Experiment 2	Experiment 3
%cells with mother cortex localization	74.5888	84.3649	73.4355
% cells with SPB localization	85.074	83.6769	81.2919
	DGY004
	Experiment 1	Experiment 2	Experiment 3
%cells with mother cortex localization	12.0851	7.70218	8.65801
% cells with SPB localization	15.9274	20.9177	17.4892
