# Supplementary material for: Protein phosphatase 1 in association with Bud14 inhibits mitotic exit in Saccharomyces cerevisiae
Source: eLife. 2021 Oct 11;10:e72833. doi: 10.7554/eLife.72833 (PMC8577847; doi:10.7554/eLife.72833)
Supplement: Figure 2—figure supplement 1—source data 2. [file elife-72833-fig2-figsupp1-data2.xlsx]

## Sheet: Sheet2
	Experiment 1	Experiment 2	Experiment 3
	AKY4006	AKY4006	AKY4006
	lte1∆bud14∆	lte1∆bud14∆	lte1∆bud14∆
% cells with kin4 at both SPB	74.7253	73.8636	84.6154
% cells with kin4 at mSPB	9.89011	11.3636	9.61538
% cells with no SPB	15.3846	14.7727	5.76923
	AKY4016
	lte1∆	lte1∆	lte1∆
% cells with kin4 at both SPB	79.2079	80.4124	83.3333
% cells with kin4 at mSPB	12.8713	10.3093	11.9048
% cells with no SPB	7.92079	9.27835	4.7619
