# Supplementary material for: Protein phosphatase 1 in association with Bud14 inhibits mitotic exit in Saccharomyces cerevisiae
Source: eLife. 2021 Oct 11;10:e72833. doi: 10.7554/eLife.72833 (PMC8577847; doi:10.7554/eLife.72833)
Supplement: Figure 2—source data 1. [file elife-72833-fig2-data1.xlsx]

## Sheet: source data
	% cells with normal, misaligned anaphase spindle and SPOC deficient phenotypes						SPOC deficiency index= spoc deficient/misaligned*10
							strain#	experiment 1	experiment 2	experiment 3
	AKY346 (kar9∆ )						kar9∆	1.90476	1.42857	1.42857
	% cells	experiment 1	experiment 2	experiment 3			kar9∆kin4∆	8.75	12.2727	13.1818
	normal aligned	75	76.699	76.9231			kar9∆bud14∆	15.2	13.8462	14.1379
	misaligned	21	20.3883	20.1923			kar9∆kin4∆bud14∆	27.7273	26.875	27.5
	spoc deficient	4	2.91262	2.88462			kar9∆bfa1∆	35	28.8235	33.125
							kar9∆bfa1∆bud14∆	38.4615	29.4118	30
	AKY351 (kar9∆ kin4∆)
	% cells	experiment 1	experiment 2	experiment 3			two tailed t-test - p -value matrix
	normal aligned	57.5472	54.2056	51.8868				kar9∆	kar9∆kin4∆	kar9∆bud14∆	kar9∆kin4∆bud14∆	kar9∆bfa1∆	kar9∆bfa1∆bud14∆
	misaligned	22.6415	20.5607	20.7547			kar9∆	1
	spoc deficient	19.8113	25.2336	27.3585			kar9∆kin4∆	0.00195958	1
							kar9∆bud14∆	8.36298e-06	0.101483	1
	SEY032 (kar9∆ bud14∆)						kar9∆kin4∆bud14∆	1.1022e-07	0.00031461	1.15078e-05	1
	% cells	experiment 1	experiment 2	experiment 3			kar9∆bfa1∆	7.45424e-05	0.000775744	0.000667901	0.0551789	1
	normal aligned	44.7368	40.9524	42.623			kar9∆bfa1∆bud14∆	0.00044818	0.00274701	0.00349383	0.147708	0.933062	1
	misaligned	21.9298	24.7619	23.7705
	spoc deficient	33.3333	34.2857	33.6066
	AKY4048 (kar9∆ kin4∆ bud14∆)
	% cells	experiment 1	experiment 2	experiment 3
	normal aligned	32.5203	40.404	35.3448
	misaligned	17.8862	16.1616	17.2414
	spoc deficient	49.5935	43.4343	47.4138
	AKY347 (kar9∆ bfa1∆)
	% cells	experiment 1	experiment 2	experiment 3
	normal aligned	35.0515	32.6531	38.9381
	misaligned	14.433	17.3469	14.1593
	spoc deficient	50.5155	50	46.9027
	HKY175 (kar9∆ bfa1∆ bud14∆)
	% cells	experiment 1	experiment 2	experiment 3
	normal aligned	27.5862	33.6634	43.8596
	misaligned	14.9425	16.8317	14.0351
	spoc deficient	57.4713	49.505	42.1053
