# Supplementary material for: Protein phosphatase 1 in association with Bud14 inhibits mitotic exit in Saccharomyces cerevisiae
Source: eLife. 2021 Oct 11;10:e72833. doi: 10.7554/eLife.72833 (PMC8577847; doi:10.7554/eLife.72833)
Supplement: Figure 2—source data 2. [file elife-72833-fig2-data2.xlsx]

## Sheet: source data figure  2B
	% cells with normal, misaligned anaphase spindle and SPOC deficient phenotypes						SPOC deficiency index= spoc deficient/misaligned*10
							strain#	experiment 1	experiment 2	experiment 3
	SHM562 (dyn1∆ )						dyn1∆	0.76087	0.555556	0.689655
	% cells	experiment 1	experiment 2	experiment 3			dyn1∆kin4∆	4.90196	6.04651	6.84211
	normal aligned	14.6552	13.6364	18.4211			dyn1∆bud14∆	6.75676	7.27273	7.5
	misaligned	79.3103	81.8182	76.3158			dyn1∆kin4∆bud14∆	9.65517	11	12.0833
	spoc deficient	6.03448	4.54545	5.26316
	ESM2156 (dyn1∆ kin4∆)
	% cells	experiment 1	experiment 2	experiment 3			two tailed t-test - p -value matrix
	normal aligned	29.6296	39.4737	41.2844				dyn1∆	dyn1∆kin4∆	dyn1∆bud14∆	dyn1∆kin4∆bud14∆
	misaligned	47.2222	37.7193	34.8624			dyn1∆	1
	spoc deficient	23.1481	22.807	23.8532			dyn1∆kin4∆	0.000746543	1
							dyn1∆bud14∆	8.96209e-06	0.10824	1
	AKY2917 (dyn1∆ bud14∆)						dyn1∆kin4∆bud14∆	0.000130352	0.00520655	0.00709511	1
	% cells	experiment 1	experiment 2	experiment 3
	normal aligned	41.5094	48.1818	44.5545
	misaligned	34.9057	30	31.6832
	spoc deficient	23.5849	21.8182	23.7624
	AKY2918 (dyn1∆ kin4∆ bud14∆)
	% cells	experiment 1	experiment 2	experiment 3
	normal aligned	40	35.7143	43.0108
	misaligned	30.5263	30.6122	25.8065
	spoc deficient	29.4737	33.6735	31.1828
