# Supplementary material for: Protein phosphatase 1 in association with Bud14 inhibits mitotic exit in Saccharomyces cerevisiae
Source: eLife. 2021 Oct 11;10:e72833. doi: 10.7554/eLife.72833 (PMC8577847; doi:10.7554/eLife.72833)
Supplement: Figure 2—source data 3. [file elife-72833-fig2-data3.xlsx]

## Sheet: note
"Broken spindle" sheet shows the anaphase duration (min) of individual cells as calculated from the start of spindle elongation until spindle breakdown.
"Intact spindle" sheet shows cells where spindle breakdown was not observed during the course of the movie. The values indicated with greater than (>) sign are minutes from anaphase onset untill the last observered timepoint of the misaligned cell.
Anova test and descritive statistics were performed in Prism 9.
For Anova test and descriptive statics only the cells where spindle breakdown was observed considered.

## Sheet: Broken spindles
kar9del (#83)			bud14delkar9del (#316)			kin4delkar9del (#85)			kin4delbud14delkar9del (#1709)
Normal	Misaligned		Normal	Misaligned		Normal	Misaligned		Normal	Misaligned
20	26		18	22		18	20		15	22
17	32		20	28		17	20		18	15
20	19		19	19		20	28		18	18
15	24		20	28		17	24		16	29
20			20	27		17	25		18	17
18			20	21		23	23		19	18
17			18	20		17	18		16	19
17			20	19		18	27		20	20
18			17	19		21	42		18	16
17			18	21		19	41		16	18
20			18	26		17	31		19	21
19			18	22		22	33		17	21
18			17	19		16	14		17	22
17			20	28		19	32		17	20
18			17	16		22	31		21	24
17			19	24		19			21	18
21			17	28		19			16	23
20			19			17			18	22
18			15			22			20
			17			19			22
			15			19			20
									17
									21
									16
									22
									21
									20
									18
									19
									17
									24
									19
18.2632	25.25	#DIV/0!	18.1905	22.7647	#DIV/0!	18.9524	27.2667	#DIV/0!	18.625	20.1667	#DIV/0!
1.55785	5.37742	#DIV/0!	1.56905	4.00826		2.03657	7.97735	#DIV/0!
									2.16646	3.31219

## Sheet: Intact spindles
kar9del (#83)			bud14delkar9del (#316)			kin4delkar9del (#85)			kin4delbud14delkar9del (#1709)
Normal	Misaligned		Normal	Misaligned		Normal	Misaligned		Normal	Misaligned
-	>84		-	>64		-	>63		-	-
	>85
	>50
	>50
	>70
	>89
	>58
	>70
	>62
	>56
	>76
	>51
	>78
	>60
	>81
	>89
	>62
	>89

## Sheet: Descriptive statistics
	kar9∆ Normal-aligned	kar9∆ Misaligned	bud14∆kar9∆ Normal-aligned	bud14∆kar9∆ Misaligned	kin4∆kar9∆ Normal-aligned	kin4∆kar9∆ Misaligned	kin4∆bud14∆kar9∆ Normalaligned	kin4∆bud14∆kar9∆ Misaligned
Number of values	19	4	21	17	21	15	32	18
Mean	18	25	18	23	19	27	19	20
Std. Deviation	1.6	5.4	1.6	4	2	8	2.2	3.3
Std. Error of Mean	0.36	2.7	0.34	0.97	0.44	2.1	0.38	0.78

## Sheet: onewayANOVA multiplecomparisons
Number of families	1
Number of comparisons per family	28
Alpha	0.05
Uncorrected Fisher's LSD	Mean Diff,	95,00% CI of diff,	Below threshold?	Summary	Individual P Value
kar9∆ Normal-aligned vs. kin4∆kar9∆ Misaligned	-9.004	-11,42 to -6,586	Yes	****	<0,0001	A-F
bud14∆kar9∆ Normal-aligned vs. kin4∆kar9∆ Misaligned	-9.076	-11,44 to -6,710	Yes	****	<0,0001	C-F
kin4∆kar9∆ Normal-aligned vs. kin4∆kar9∆ Misaligned	-8.314	-10,68 to -5,948	Yes	****	<0,0001	E-F
kin4∆kar9∆ Misaligned vs. kin4∆bud14∆kar9∆ Normalaligned	8.642	6,451 to 10,83	Yes	****	<0,0001	F-G
kin4∆kar9∆ Misaligned vs. kin4∆bud14∆kar9∆ Misaligned	7.1	4,653 to 9,547	Yes	****	<0,0001	F-H
bud14∆kar9∆ Normal-aligned vs. bud14∆kar9∆ Misaligned	-4.574	-6,858 to -2,290	Yes	***	0.0001	C-D
kar9∆ Normal-aligned vs. bud14∆kar9∆ Misaligned	-4.502	-6,839 to -2,164	Yes	***	0.0002	A-D
bud14∆kar9∆ Misaligned vs. kin4∆bud14∆kar9∆ Normalaligned	4.14	2,039 to 6,241	Yes	***	0.0002	D-G
kar9∆ Misaligned vs. bud14∆kar9∆ Normal-aligned	7.06	3,240 to 10,88	Yes	***	0.0004	B-C
kar9∆ Normal-aligned vs. kar9∆ Misaligned	-6.987	-10,84 to -3,136	Yes	***	0.0005	A-B
bud14∆kar9∆ Misaligned vs. kin4∆kar9∆ Misaligned	-4.502	-6,982 to -2,022	Yes	***	0.0005	D-F
kar9∆ Misaligned vs. kin4∆bud14∆kar9∆ Normalaligned	6.625	2,912 to 10,34	Yes	***	0.0006	B-G
bud14∆kar9∆ Misaligned vs. kin4∆kar9∆ Normal-aligned	3.812	1,528 to 6,096	Yes	**	0.0012	D-E
kar9∆ Misaligned vs. kin4∆kar9∆ Normal-aligned	6.298	2,478 to 10,12	Yes	**	0.0014	B-E
kar9∆ Misaligned vs. kin4∆bud14∆kar9∆ Misaligned	5.083	1,214 to 8,953	Yes	*	0.0104	B-H
bud14∆kar9∆ Misaligned vs. kin4∆bud14∆kar9∆ Misaligned	2.598	0,2304 to 4,966	Yes	*	0.0317	D-H
bud14∆kar9∆ Normal-aligned vs. kin4∆bud14∆kar9∆ Misaligned	-1.976	-4,225 to 0,2725	No	ns	0.0845	C-H
kar9∆ Normal-aligned vs. kin4∆bud14∆kar9∆ Misaligned	-1.904	-4,206 to 0,3991	No	ns	0.1044	A-H
kin4∆bud14∆kar9∆ Normalaligned vs. kin4∆bud14∆kar9∆ Misaligned	-1.542	-3,604 to 0,5209	No	ns	0.1417	G-H
kar9∆ Misaligned vs. bud14∆kar9∆ Misaligned	2.485	-1,405 to 6,376	No	ns	0.2087	B-D
kin4∆kar9∆ Normal-aligned vs. kin4∆bud14∆kar9∆ Misaligned	-1.214	-3,463 to 1,034	No	ns	0.2875	E-H
kar9∆ Misaligned vs. kin4∆kar9∆ Misaligned	-2.017	-5,956 to 1,923	No	ns	0.3132	B-F
bud14∆kar9∆ Normal-aligned vs. kin4∆kar9∆ Normal-aligned	-0.7619	-2,922 to 1,399	No	ns	0.4868	C-E
kar9∆ Normal-aligned vs. kin4∆kar9∆ Normal-aligned	-0.6892	-2,906 to 1,527	No	ns	0.5397	A-E
bud14∆kar9∆ Normal-aligned vs. kin4∆bud14∆kar9∆ Normalaligned	-0.4345	-2,401 to 1,532	No	ns	0.6628	C-G
kar9∆ Normal-aligned vs. kin4∆bud14∆kar9∆ Normalaligned	-0.3618	-2,389 to 1,666	No	ns	0.7247	A-G
kin4∆kar9∆ Normal-aligned vs. kin4∆bud14∆kar9∆ Normalaligned	0.3274	-1,639 to 2,293	No	ns	0.7425	E-G
kar9∆ Normal-aligned vs. bud14∆kar9∆ Normal-aligned	0.07268	-2,144 to 2,289	No	ns	0.9484	A-C
Test details	Mean 1	Mean 2	Mean Diff,	SE of diff,	n1	n2	t	DF
kar9∆ Normal-aligned vs. kar9∆ Misaligned	18.26	25.25	-6.987	1.948	19	4	3.587	139
kar9∆ Normal-aligned vs. bud14∆kar9∆ Normal-aligned	18.26	18.19	0.07268	1.121	19	21	0.06483	139
kar9∆ Normal-aligned vs. bud14∆kar9∆ Misaligned	18.26	22.76	-4.502	1.182	19	17	3.808	139
kar9∆ Normal-aligned vs. kin4∆kar9∆ Normal-aligned	18.26	18.95	-0.6892	1.121	19	21	0.6148	139
kar9∆ Normal-aligned vs. kin4∆kar9∆ Misaligned	18.26	27.27	-9.004	1.223	19	15	7.362	139
kar9∆ Normal-aligned vs. kin4∆bud14∆kar9∆ Normalaligned	18.26	18.63	-0.3618	1.025	19	32	0.3529	139
kar9∆ Normal-aligned vs. kin4∆bud14∆kar9∆ Misaligned	18.26	20.17	-1.904	1.165	19	18	1.634	139
kar9∆ Misaligned vs. bud14∆kar9∆ Normal-aligned	25.25	18.19	7.06	1.932	4	21	3.655	139
kar9∆ Misaligned vs. bud14∆kar9∆ Misaligned	25.25	22.76	2.485	1.968	4	17	1.263	139
kar9∆ Misaligned vs. kin4∆kar9∆ Normal-aligned	25.25	18.95	6.298	1.932	4	21	3.26	139
kar9∆ Misaligned vs. kin4∆kar9∆ Misaligned	25.25	27.27	-2.017	1.992	4	15	1.012	139
kar9∆ Misaligned vs. kin4∆bud14∆kar9∆ Normalaligned	25.25	18.63	6.625	1.878	4	32	3.528	139
kar9∆ Misaligned vs. kin4∆bud14∆kar9∆ Misaligned	25.25	20.17	5.083	1.957	4	18	2.597	139
bud14∆kar9∆ Normal-aligned vs. bud14∆kar9∆ Misaligned	18.19	22.76	-4.574	1.155	21	17	3.96	139
bud14∆kar9∆ Normal-aligned vs. kin4∆kar9∆ Normal-aligned	18.19	18.95	-0.7619	1.093	21	21	0.6973	139
bud14∆kar9∆ Normal-aligned vs. kin4∆kar9∆ Misaligned	18.19	27.27	-9.076	1.197	21	15	7.583	139
bud14∆kar9∆ Normal-aligned vs. kin4∆bud14∆kar9∆ Normalaligned	18.19	18.63	-0.4345	0.9944	21	32	0.437	139
bud14∆kar9∆ Normal-aligned vs. kin4∆bud14∆kar9∆ Misaligned	18.19	20.17	-1.976	1.137	21	18	1.738	139
bud14∆kar9∆ Misaligned vs. kin4∆kar9∆ Normal-aligned	22.76	18.95	3.812	1.155	17	21	3.3	139
bud14∆kar9∆ Misaligned vs. kin4∆kar9∆ Misaligned	22.76	27.27	-4.502	1.254	17	15	3.589	139
bud14∆kar9∆ Misaligned vs. kin4∆bud14∆kar9∆ Normalaligned	22.76	18.63	4.14	1.063	17	32	3.896	139
bud14∆kar9∆ Misaligned vs. kin4∆bud14∆kar9∆ Misaligned	22.76	20.17	2.598	1.197	17	18	2.17	139
kin4∆kar9∆ Normal-aligned vs. kin4∆kar9∆ Misaligned	18.95	27.27	-8.314	1.197	21	15	6.946	139
kin4∆kar9∆ Normal-aligned vs. kin4∆bud14∆kar9∆ Normalaligned	18.95	18.63	0.3274	0.9944	21	32	0.3292	139
kin4∆kar9∆ Normal-aligned vs. kin4∆bud14∆kar9∆ Misaligned	18.95	20.17	-1.214	1.137	21	18	1.068	139
kin4∆kar9∆ Misaligned vs. kin4∆bud14∆kar9∆ Normalaligned	27.27	18.63	8.642	1.108	15	32	7.8	139
kin4∆kar9∆ Misaligned vs. kin4∆bud14∆kar9∆ Misaligned	27.27	20.17	7.1	1.238	15	18	5.736	139
kin4∆bud14∆kar9∆ Normalaligned vs. kin4∆bud14∆kar9∆ Misaligned	18.63	20.17	-1.542	1.043	32	18	1.478	139
