# Supplementary material for: Protein phosphatase 1 in association with Bud14 inhibits mitotic exit in Saccharomyces cerevisiae
Source: eLife. 2021 Oct 11;10:e72833. doi: 10.7554/eLife.72833 (PMC8577847; doi:10.7554/eLife.72833)
Supplement: Figure 3—source data 1. [file elife-72833-fig3-data1.xlsx]

## Sheet: source data
	% cells with normal, misaligned anaphase spindle and SPOC deficient phenotypes
						SPOC deficiency index= spoc deficient/misaligned*10
	empty*					strain#	experiment 1	experiment 2	experiment 3
	% cells	experiment 1	experiment 2	experiment 3		empty	10	21.875	15.3308
	Normal	36.5385	45.7447	41.373		BUD14	2.29647	3	1.99546
	Misaligned	31.7308	17.0213	23.1446		bud14-5A	0.833333	0.625	1.33334
	SPOC Deficient	31.7308	37.234	35.4824
						ttest matrix
	BUD14*						empty	BUD14	bud14-5A
	% cells	experiment 1	experiment 2	experiment 3		empty	1
	Normal	68.6078	70.3704	68.1243		BUD14	0.0181483	1
	Misaligned	25.5294	25	26.5731		bud14-5A	0.0126138	0.0146496	1
	SPOC Deficient	5.86275	4.62963	5.30256
	bud14-5A
	% cells	experiment 1	experiment 2	experiment 3
	Normal	75.9259	66.9903	74.3321
	Misaligned	22.2222	31.068	22.6481
	SPOC Deficient	1.85185	1.94175	3.01977
	*Note: Data for "empty" and "BUD14" samples are identical to the corresponding data shown in Figure 5 - Figure Supplement 2A. SPOC functionality assays of empty, BUD14, bud14-5A and bud14∆sH3 were done in the same experiment but were shown in different figures to match the presentation order in the text.
