# Supplementary material for: Protein phosphatase 1 in association with Bud14 inhibits mitotic exit in Saccharomyces cerevisiae
Source: eLife. 2021 Oct 11;10:e72833. doi: 10.7554/eLife.72833 (PMC8577847; doi:10.7554/eLife.72833)
Supplement: Figure 3—source data 2. [file elife-72833-fig3-data2.xlsx]

## Sheet: source data
% cells with normal, misaligned anaphase spindle and SPOC deficient phenotypes					SPOC deficiency index= spoc deficient/misaligned*10
						experiment 1	experiment 2	experiment 3
					79 - kar9∆	0	0	0.47619
79 - kar9∆					92 - kar9∆bud14∆	11.6	14.6154	11.7647
% cells	experiment 1	experiment 2	experiment 3		1934 - kar9∆kel1∆	2.38095	0.909091	0.714286
Normal	79.8165	76.3889	78		1936 - kar9∆kel2∆	0.454545	0	1.25
Misaligned	20.1835	23.6111	21
SPOC Deficient	0	0	1
					two tailed t-test matrix
92 - kar9∆bud14∆						79 - kar9∆	92 - kar9∆bud14∆	1934 - kar9∆kel1∆	1936 - kar9∆kel2∆
% cells	experiment 1	experiment 2	experiment 3		79 - kar9∆	1
Normal	55.3719	41.8182	58.8889		92 - kar9∆bud14∆	0.000227882	1
Misaligned	20.6612	23.6364	18.8889		1934 - kar9∆kel1∆	0.0990755	0.000522212	1
SPOC Deficient	23.9669	34.5455	22.2222		1936 - kar9∆kel2∆	0.362033	0.000318388	0.297432	1
1934 - kar9∆kel1∆
% cells	experiment 1	experiment 2	experiment 3
Normal	76.7857	81.5385	76.5625
Misaligned	18.75	16.9231	21.875
SPOC Deficient	4.46429	1.53846	1.5625
1936 - kar9∆kel2∆
% cells	experiment 1	experiment 2	experiment 3
Normal	78.7037	89.4737	85.4839
Misaligned	20.3704	10.5263	12.9032
SPOC Deficient	0.925926	0	1.6129
