# Supplementary material for: Protein phosphatase 1 in association with Bud14 inhibits mitotic exit in Saccharomyces cerevisiae
Source: eLife. 2021 Oct 11;10:e72833. doi: 10.7554/eLife.72833 (PMC8577847; doi:10.7554/eLife.72833)
Supplement: Figure 4—source data 1. [file elife-72833-fig4-data1.xlsx]

## Sheet: SOURCE DATA
	% cells with normal, misaligned anaphase spindle and SPOC deficient phenotypes					SPOC deficiency index= spoc deficient/misaligned*10
	kar9Δbud14Δ empty						experiment 1	experiment 2	experiment 3
	% cells	experiment 1	experiment 2	experiment 3		kar9Δbud14Δ empty	8	10.625	12.1429
	Normal	73.2673	68.8679	73.5043		kar9Δbud14Δ BUD14	0.769231	0.47619	0.666667
	Misaligned	14.8515	15.0943	11.9658		kar9Δbud14Δ BUD14[F379A]	14.2857	9.04762	7.27273
	SPOC Deficient	11.8812	16.0377	14.5299
	kar9Δbud14Δ BUD14					two-tailed ttest matrix
	% cells	experiment 1	experiment 2	experiment 2			kar9Δbud14Δ empty	kar9Δbud14Δ BUD14	kar9Δbud14Δ BUD14[F379A]
	Normal	86.1386	80.531	84.1584		kar9Δbud14Δ empty	1
	Misaligned	12.8713	18.5841	14.8515		kar9Δbud14Δ BUD14	0.00136972	1
	SPOC Deficient	0.990099	0.884956	0.990099		kar9Δbud14Δ BUD14[F379A]	0.983343	0.0104997	1
	kar9Δbud14Δ BUD14[F379A]
	% cells	experiment 1	experiment 2	experiment 2
	Normal	66	65.2174	62.7451
	Misaligned	14	18.2609	21.5686
	SPOC Deficient	20	16.5217	15.6863
