# Supplementary material for: Protein phosphatase 1 in association with Bud14 inhibits mitotic exit in Saccharomyces cerevisiae
Source: eLife. 2021 Oct 11;10:e72833. doi: 10.7554/eLife.72833 (PMC8577847; doi:10.7554/eLife.72833)
Supplement: Figure 4—source data 2. [file elife-72833-fig4-data2.xlsx]

## Sheet: source data
	% cells with normal, misaligned anaphase spindle and SPOC deficient phenotypes							SPOC deficiency index= spoc deficient/misaligned*10
									experiment 1	experiment 2	experiment 3
	AKY4078 (kar9∆ GLC7)							AKY4078	2.63158	0	0
	% cells	experiment 1	experiment 2	experiment 3				AKY4079	11.3333	11.4286	22.5
	normal aligned	77.9817	76.9231	85.2941
	misaligned	17.4312	23.0769	14.7059
	spoc deficient	4.58716	0	0				two tailed ttest
								0.0202823
	AKY4079 (kar9∆ glc7-ts)
	% cells	experiment 1	experiment 2	experiment 3
	normal aligned	69.2308	73.4513	78.6885
	misaligned	14.4231	12.3894	6.55738
	spoc deficient	16.3462	14.1593	14.7541
