# Supplementary material for: Protein phosphatase 1 in association with Bud14 inhibits mitotic exit in Saccharomyces cerevisiae
Source: eLife. 2021 Oct 11;10:e72833. doi: 10.7554/eLife.72833 (PMC8577847; doi:10.7554/eLife.72833)
Supplement: Figure 6—figure supplement 1—source data 1. [file elife-72833-fig6-figsupp1-data1.xlsx]

## Sheet: Data
	WT % SPB localization		bfa1Δ % SPB localization		kin4Δ % SPB localization		bud14Δ % SPB localization		bud14Δkin4Δ % SPB localization
Experiment 1	1		61		4		5		4
Experiment 2	0		51		4		2		2
Experiment 3	0		48		2		2		10

## Sheet: Anova
Number of families	1
Number of comparisons per family	10
Alpha	0.05
Tukey's multiple comparisons test	Mean Diff,	95,00% CI of diff,	Below threshold?	Summary	Adjusted P Value
WT vs. bfa1Δ	-53	-62,93 to -43,07	Yes	****	<0,0001	A-B
WT vs. kin4Δ	-3	-12,93 to 6,934	No	ns	0.8523	A-C
WT vs. bud14Δ	-2.667	-12,60 to 7,267	No	ns	0.8967	A-D
WT vs. bud14Δkin4Δ	-5	-14,93 to 4,934	No	ns	0.4982	A-E
bfa1Δ vs. kin4Δ	50	40,07 to 59,93	Yes	****	<0,0001	B-C
bfa1Δ vs. bud14Δ	50.33	40,40 to 60,27	Yes	****	<0,0001	B-D
bfa1Δ vs. bud14Δkin4Δ	48	38,07 to 57,93	Yes	****	<0,0001	B-E
kin4Δ vs. bud14Δ	0.3333	-9,601 to 10,27	No	ns	>0,9999	C-D
kin4Δ vs. bud14Δkin4Δ	-2	-11,93 to 7,934	No	ns	0.9602	C-E
bud14Δ vs. bud14Δkin4Δ	-2.333	-12,27 to 7,601	No	ns	0.9328	D-E
Test details	Mean 1	Mean 2	Mean Diff,	SE of diff,	n1	n2	q	DF
WT vs. bfa1Δ	0.3333	53.33	-53	3.018	3	3	24.83	10
WT vs. kin4Δ	0.3333	3.333	-3	3.018	3	3	1.406	10
WT vs. bud14Δ	0.3333	3	-2.667	3.018	3	3	1.249	10
WT vs. bud14Δkin4Δ	0.3333	5.333	-5	3.018	3	3	2.343	10
bfa1Δ vs. kin4Δ	53.33	3.333	50	3.018	3	3	23.43	10
bfa1Δ vs. bud14Δ	53.33	3	50.33	3.018	3	3	23.58	10
bfa1Δ vs. bud14Δkin4Δ	53.33	5.333	48	3.018	3	3	22.49	10
kin4Δ vs. bud14Δ	3.333	3	0.3333	3.018	3	3	0.1562	10
kin4Δ vs. bud14Δkin4Δ	3.333	5.333	-2	3.018	3	3	0.937	10
bud14Δ vs. bud14Δkin4Δ	3	5.333	-2.333	3.018	3	3	1.093	10
