# Supplementary material for: Protein phosphatase 1 in association with Bud14 inhibits mitotic exit in Saccharomyces cerevisiae
Source: eLife. 2021 Oct 11;10:e72833. doi: 10.7554/eLife.72833 (PMC8577847; doi:10.7554/eLife.72833)
Supplement: Figure 6—figure supplement 1—source data 2. [file elife-72833-fig6-figsupp1-data2.xlsx]

## Sheet: Data
Bub2-GFP						Tem1-GFP
WT			bud14Δ			WT			bud14Δ
SPB1	SPB2		SPB1	SPB2		SPB1	SPB2		SPB1	SPB2
77.23	3340.42		43.169	6208.49		528.468	2595.87		729.358	9197.73
-535.874	3195.93		106.809	2440.58		485.639	3306.17		826.954	3200.74
-310.801	2950.3		20.485	5805.03		-654.021	880.791		424.495	6020.64
-85.75	2131.61		-29.206	4971.88		-406.169	696.786		539.408	3139.18
-382.212	2704.43		204.651	2710.67		293.682	1590.22		272.959	4994.49
262.371	2971.47		-435.545	4679.31		393.661	4086.35		95.104	2952.48
-145.227	150.48		-171.94	79.673		57.405	2023.53		238.205	3696.3
-73.256	1977.99		-281.927	3621.02		333.444	3497.54		386.792	3865.56
-148.845	2199.66		59.245	3138.07		190.428	1850.86		601.769	2348.91
-230.115	557.077		318.185	4613.03		75.359	2279.48		50.007	2617.54
4.933	2318.94		-412.924	4544.28		455.452	3604.77		-149.927	3880.93
-13.881	2438.71		423.779	2902.07		160.601	3252.11		160.922	2872.26
91.167	2501.72		273.006	-297.442		312.73	2221.14		-80.243	3168.73
1063	1533.63		-8.845	1372.14		197.893	3688.92		-93.354	2801.07
-1384.12	1918.59		-142.476	4528.13		118.073	2028.92		385.033	3906.61
-292.637	2361.68		85.326	2845.57		596.113	2011.94		67.224	4356.96
65.143	2620.14		-125.46	1952.46		439.638	2628.01		150.298	1631.68
-312.612	2240.83		-193.733	2222.88		313.444	2312.35		251.025	1595.62
-238.195	2142.2		-128.23	2376.92		281.033	1987.03		599.917	3742.82
-184.833	2105.71		206.032	3336.12		564.267	2648.36		393.08	4123.53
354.55	3217.9		357.254	2030.48		180.524	3211.04		-148.24	1240.28
-311.466	1618.2		348.098	3623.49		494.843	2286.92		-316.945	2446.04
121.681	1954.42		27.931	2917.02		-175.833	1610.53		-698.276	2355.84
-268.328	3851.21		234.401	4047.21		389.487	2419.05		1169.72	1298.39
6.85	2579.95		-189.348	2983.9		294.307	1864.3		276.975	2109.94
-226.16	4120.82		588.738	2489.96		38.491	2585.09		153.648	2347.99
-12.512	2873.39		-35.65	1939.14		400.555	1497.45		319.628	3212.17
614.18	965.231		-281.388	3750.12		-27.439	2590.75		-258.421	2512.71
-131.073	1752.64		-26.336	4913.54		291.394	1181.39		-68.526	5742.98
-211.681	1824.69		-137.936	3453.51		1335.87	1091.84		431.321	2874.36
-345.393	147.534		-28.108	4005.14		-77.742	1206.9		402.181	934.319
-194.242	247.723		-382.659	1641.08		270.494	2274.57		143.059	2110.58
-327.561	167.183		-73.644	3710.71		351.818	4025.1		438.536	3018.95
-349.15	618.297		351.025	3909.72		913.636	1261.26		603.421	3295.58
-305.361	1684.97		-219.733	5285.02		499.897	1683.49		901.748	2372.06
-288.631	458.409		-106.865	4493.45		809.853	2843.03		774.467	3044.53
-332.703	1719.27		-8.061	724.116		152.474	1193.8		421.474	3571.01
30.143	2416.77		48.425	4844.21		262.286	2468.81		239.31	3198.56
-192.19	1634.5		74.286	3206.57		-32.807	1926.09		-162.44	4541.43
204.943	2859.22		9.451	2948.61		47.378	446.921		728.925	2706.59
-83.083	1745.05		50.279	3522.04		18.222	1717.88		257.19	2956.5
-306.789	1627.83		108.902	2445.62		1044.7	2444.34		-323.646	5786.14
109.146	2409.23		-69.446	4145.51		333.789	2349.18		533.913	2735.65
-106.452	1740.72		-119.527	3523.36		492.204	3051.81		721.363	4812.06
-193.643	2599.42		-193.182	3303.31		-55.833	685.094		155.148	4248.46
-240.054	166.732		-343.583	983.485		842.605	2908.03		1115.68	2300.24
-349.264	2732.68		-209.697	4096.7		214.738	2317.64		98.134	3367.55
-20.112	2380.36		-380.029	3726.43		402.749	2108.93		-24.712	5429.83
-212.96	991.369		266.828	2952.83		50.44	1247.04		462.599	1219.02
168.311	1585.31		-170.187	2206.21		-131.902	775.507		114.125	4032.71
-360.97	2484.8		-406.148	4218.85		413.424	1814.92		452.615	3152.97
-248.787	2362.61		-218.347	2673.04		108.846	1915.11		375.72	4522.92
-148.283	1961.22		-249.709	2364.9		106.508	943.452		-121.158	6484.02
-101.657	3304.11		-283.479	1002.74		13.578	1725.02		838.376	1522.78
3.2	1584.37		272.433	2366.55		368.412	3268.99		373.547	2517.07
-190.769	269.372		115.771	4127.25		611.094	2542.51		770.707	1554.09
-125.803	1600.7		-162.996	2329.24		393.368	3202.73		181.679	2723.59
19.589	2378.03		-113.771	3479.25		77.06	2533.47		668.617	1633.92
-86.992	447.84		186.837	3477.22		224.112	1615.69		16.398	6162.97
-197.79	2176.39		-232.737	3346.98		559.751	2242.92		-490.852	3474.77
-102.776	2832.04		-294.834	4033.38		150.297	630.944		-34.812	2919.6
111.468	2113.89		456.004	1712.04		151.375	399.423		-317.949	6372.98
-25.927	1591.2		-541.68	3437.41		316.811	956.02		-166.38	3340.86
-264.986	1947.47		-266.704	3596.87		41.773	2415.85		637.921	2606.14
-251.269	1654.02		-179.798	3655.85		-148.42	901.655		524.607	1326.01
-309.335	1473.22		171	2679.4		-70.113	77.698		988.873	4460.73
-7.963	1727.12		34.064	3585.93		312.289	3194.15		-174.813	1711.73
-0.35	1370.42		-81.79	3807.37		-368.086	2403.13		-60.396	1718.01
-119.271	1584.56		3.222	2228.74		165.206	2316.56		232.265	3202.42
61.163	2660.05		-401.771	4633.74		-257.78	597.933		-232.214	3272.33
			-353.343	3981.38		500.523	994.579		463.901	3018.03
						323.6	2844.31		39.055	4519.63
						162.218	2443.98		193.611	1877.29
						221.417	2065.62		-597.862	3715.4
						414.624	865.534		-111.285	3905.68
						52.334	1971.17		280.281	3448.17
						479.16	1276.02		157.8	1457.79
						34.992	1502.2		634.275	1095.13
						3.202	2202.16		-226.051	2174.15
						348.406	1042.16		30.714	4027.49
						459.072	1625.66		172.199	985.793
						145.285	1121.28		946.487	1007.51
						-46.673	721.362		2120.43	1600.84
						423.743	2321.85		-1118.61	674.952
						103.202	1996.92		41.952	3807.35
						470.897	2154.68		369.983	1499.33
						838.478	1011.91		-145.562	3153.66
						307.205	2961.97		202.532	2566.48
						602.241	2895.47		476.645	2006.59
						438.271	1269.46		269.399	2118.36
						117.034	1941.44		-6.364	2741.93
						718.431	1249.47
						26.913	1297.79
						680.086	1613.34
						677.914	2100.2
						276.22	2589.15
						209.06	2177.71
						318.341	2176.92
						328.809	1627.31
						778.947	2374.28
						-11.286	1561.21
						267.972	1367.26
						-3.791	2298.03
						111.872	2423.66
						210.577	502.329
						109.982	2183.04
						-23.457	2408.66
						172.931	1260.33
						329.466	2494.67
						60.835	1519.18
						230.353	2526.62
						-221.154	1809.36
						-205.21	1113
						284.807	1274.73
						-372.913	1748.84
						-508.116	2926.93
						541.504	1609.02
						243.624	1650.99
						-399.625	2348.5
						-233.108	549.415
						99.631	2504.96
						-210.126	1852.9

## Sheet: Anova Bub2
Number of families	1
Number of comparisons per family	6
Alpha	0.05
Uncorrected Fisher's LSD	Mean Diff,	95,00% CI of diff,	Below threshold?	Summary	Individual P Value
WT mSPB vs. WT dSPB	-2044	-2320 to -1768	Yes	****	<0,0001	A-B
WT mSPB vs. bud14∆ mSPB	-75.72	-349,8 to 198,3	No	ns	0.5869	A-C
WT mSPB vs. bud14∆dSPB	-3252	-3526 to -2978	Yes	****	<0,0001	A-D
WT dSPB vs. bud14∆ mSPB	1968	1694 to 2242	Yes	****	<0,0001	B-C
WT dSPB vs. bud14∆dSPB	-1208	-1482 to -934,2	Yes	****	<0,0001	B-D
bud14∆ mSPB vs. bud14∆dSPB	-3176	-3448 to -2904	Yes	****	<0,0001	C-D
Test details	Mean 1	Mean 2	Mean Diff,	SE of diff,	n1	n2	t	DF
WT mSPB vs. WT dSPB	-120	1924	-2044	140.2	71	71	14.58	284
WT mSPB vs. bud14∆ mSPB	-120	-44.28	-75.72	139.2	71	73	0.5439	284
WT mSPB vs. bud14∆dSPB	-120	3132	-3252	139.2	71	73	23.36	284
WT dSPB vs. bud14∆ mSPB	1924	-44.28	1968	139.2	71	73	14.14	284
WT dSPB vs. bud14∆dSPB	1924	3132	-1208	139.2	71	73	8.679	284
bud14∆ mSPB vs. bud14∆dSPB	-44.28	3132	-3176	138.3	73	73	22.97	284

## Sheet: Anova Tem1
Number of families	1
Number of comparisons per family	6
Alpha	0.05
Uncorrected Fisher's LSD	Mean Diff,	95,00% CI of diff,	Below threshold?	Summary	Individual P Value
WT mSPB vs. WT dSPB	-1708	-1927 to -1489	Yes	****	<0,0001	A-B
WT mSPB vs. bud14∆ mSPB	-16	-252,3 to 220,3	No	ns	0.8942	A-C
WT mSPB vs. bud14∆dSPB	-2802	-3038 to -2565	Yes	****	<0,0001	A-D
WT dSPB vs. bud14∆ mSPB	1692	1456 to 1928	Yes	****	<0,0001	B-C
WT dSPB vs. bud14∆dSPB	-1093	-1330 to -857,0	Yes	****	<0,0001	B-D
bud14∆ mSPB vs. bud14∆dSPB	-2786	-3038 to -2533	Yes	****	<0,0001	C-D
Test details	Mean 1	Mean 2	Mean Diff,	SE of diff,	n1	n2	t	DF
WT mSPB vs. WT dSPB	231.1	1939	-1708	111.6	123	123	15.31	428
WT mSPB vs. bud14∆ mSPB	231.1	247.1	-16	120.2	123	93	0.1331	428
WT mSPB vs. bud14∆dSPB	231.1	3033	-2802	120.2	123	93	23.3	428
WT dSPB vs. bud14∆ mSPB	1939	247.1	1692	120.2	123	93	14.08	428
WT dSPB vs. bud14∆dSPB	1939	3033	-1093	120.2	123	93	9.095	428
bud14∆ mSPB vs. bud14∆dSPB	247.1	3033	-2786	128.3	93	93	21.71	428
