# Supplementary material for: Protein phosphatase 1 in association with Bud14 inhibits mitotic exit in Saccharomyces cerevisiae
Source: eLife. 2021 Oct 11;10:e72833. doi: 10.7554/eLife.72833 (PMC8577847; doi:10.7554/eLife.72833)
Supplement: Figure 6—figure supplement 1—source data 3. [file elife-72833-fig6-figsupp1-data3.xlsx]

## Sheet: Data
Bfa1-GFP						Bub2-GFP						Tem1-GFP
WT			bud14Δ			WT			bud14Δ			WT			bud14Δ
SPB1	SPB2		SPB1	SPB2		SPB1	SPB2		SPB1	SPB2		SPB1	SPB2		SPB1	SPB2
39.377	6521.07		1214.76	8196.86		276.432	2564.53		336.833	4931.1		786.904	4415.1		1376	6085.12
-55.888	3470.02		2242.85	4903.61		361.235	2513.31		570.048	3910.57		738.178	3057.99		863.595	3395.5
50.382	3174		855.674	5453.01		945.445	3674.11		1272.69	1766.47		625.773	2795.34		941.382	4650.38
226.381	2764.6		1760.34	2172.79		-3.71	3277.55		211.043	3463.85		225.543	2655.5		913.605	4449.84
996.792	2664.22		1046.68	4561.47		303.259	2097.52		882.373	4059.28		707.932	2170.34		-44.697	4970.52
464.145	3333.14		1003.84	1672.56		132.037	2794.89		144.357	3323.74		196.651	2143.44		161.331	4818.09
783.303	1944.52		289.912	2870.01		602.991	2462.44		469.503	3168.67		583.121	2413.67		1014.09	5079.42
50.546	3018.28		342.567	3807.16		703.181	844.277		880.124	2836.84		-710.062	3221.46		195.74	3746.12
-341.529	3869.28		1845.31	7468.98		344.782	2864.23		407.963	3591.92		-227.773	2201.11		676.61	2904.75
111.624	3282.65		1373.96	6410.18		704.655	3209.84		178.995	3056.14		613.643	2781.74		968.816	4183.72
-72.333	4505.38		-399.152	5534.97		609.392	2386.42		339.432	3398.86		-328.81	2427.24		489.829	3554.5
1815.83	4334.28		2590.5	2818.45		1671.37	2054.37		27.561	2619.51		560.493	3444.23		-475.954	5053.4
60.25	2882.7		2248.04	2629.02		278.769	2023.05		423.144	4809.88		625	3537.95		844.989	3089.96
147.363	4279.22		1505.8	3906.19		349.533	1950.44		648.737	2239.14		-248.898	3172.27		636.9	3615.04
-31.82	2323.61		2368.59	5788.02		913.786	2358.93		391.467	2618.2		-145.917	3097.51		440.916	2322.94
165.76	4931.26		1530.87	5586.16		377.814	1730.79		205.677	3549.08		610.374	2168.35		392.937	2624.27
1344.95	3223.59		290.243	8644.98		67.383	2450.17		460.057	3497.98		454.833	3605.07		676.832	2064.69
78.458	3469.17		512.839	7715.43		119.122	1352.48		706.353	3242.04		117.291	2350.55		943.203	1958.32
-334.1	3087.78		2635.24	6808.6		776.218	2407		103.691	3405.45		96.27	1869.13		363.252	6060.49
-291.255	3119.08		992.687	5169.69		112.425	2610.16		413.854	3034.52		-45.104	3329.52		427.648	4249.55
1247.66	2187.85		1079.77	2030.41		177.403	2010.09		692.826	2107.11		-58.249	2102.87		-244.504	3537.45
-366.847	2840.25		-513.51	6525.61		1122.21	1671.38		400.221	2219.55		625.392	1882.39		396.284	3150.21
799.876	2559.8		1572.87	3110.02		-47.056	1894.47		72.881	3047.5		-285.108	2321.58		980.759	2515.55
222.038	2952.28		2379.47	2787.38		404.4	3304.21		591.354	1657.31		383.429	2366.6		450.095	3871.02
175.587	2535.01		677.057	3833.87		342.277	2521.18		391.076	2858.03		77.46	2327.6		694.645	3573.17
119.816	2860.96		3120.74	3346.14		288.967	1091.4		735.359	4860.95		258.398	2388.3		277.813	3936.6
-29.487	3238.61		1126.89	3514.6		140.946	2201.78		437.725	3231.77		51.885	1132		579.886	2821.89
1132.08	4082.99		1519.07	3226.62		20.462	1426.34		298.218	3684.19		1075.95	2694.66		384.214	3913.81
-56.095	2997.19		396.832	5074.55		390.55	2705.88		269.548	2576.52		723.205	2247.47		621.699	4736.32
9.247	4838.29		137.963	6577.44		387.965	2124.08		335.309	3406.69		376.29	3357.6		509.575	4206.96
487.91	1559.65		716.549	3808.05		326.688	2414.21		116.484	2244.72		-384.875	2235.91		478.129	2542.06
458.287	3102.24		-832.887	7277.9		894.508	1308.77		461.505	1382.2		455.519	2967.92		852.071	1730.05
-448.775	4079.44		1676.84	2974.63		296.926	3433.95		520.886	2148.24		603.213	2511.83		-358.462	5532.01
112.924	4110.33		1879.46	2443.06		52.677	2292.06		300.036	2432.92		-244.186	1321.93		64.946	5850.21
-333.39	1808.49		1018.26	3853.12		237.657	1559.23		491.913	2353.49		654.555	2858.34		220.083	3050.27
-36.966	2544.75		571.078	5102.72		433.419	2386.09		323.338	1750.74		302.643	1872.33		904.182	5760.06
170.205	3636.01		1438.2	2151.43		600.909	2172.6		-21.972	1871.58		1092.78	2457.09		287.255	2866.09
-164.295	3893.13		1950.32	4839.1		361.457	2433.46		-52.77	2203.9		421.108	2517.99		125.628	3498.56
-219.525	2961.19		1621.99	5615.51		250.216	2047.55		249.206	2028.47		761.069	2799.45		883.856	2817.38
-14.73	2574.72		2274.43	5202.29		-70.303	1156.67		-58.691	2049.81		-38.117	2404.74		-37.649	3800.85
416.439	3277.11		4540.65	4859.91		-114.461	1648.9		24.335	2415.38		842.329	1956.11		292.933	2397.48
1161.92	3562.02		1087.73	4207.47		-163.72	1953.21		469.903	2567.78		-161.69	2084.24		495.939	4232.13
586.945	2449.92		1238.91	4926.1		225.44	2785.7		-622.469	1707.32		-505.306	3168.34		110.875	2090.99
120.326	4837.52		-148.377	9107.69		256.733	1704.57		1374.39	2562.72		250.932	1804.17		454.448	4755.09
-239.759	2793.69		886.663	3638.33		425.957	1716.1		271.76	3717.67		-22.206	2146.25		659.624	5223.65
152.427	3057.09		1669.11	7175.94		146.689	1507.62		915.519	2760.83		265.037	2273.66		1116.03	5356.07
-588.117	2806.07		227.759	5171.16		-23.053	1509.69		179.877	3226.73		-20.694	2418.64		57.478	3589.55
34.428	2806.59		2062.25	3905.41		81.518	1408.76		1013.98	1675.31		563.324	3405.01		116.957	2608.46
-84.075	3957.95		1787.92	3403.18		-51.015	1283.6		806.316	2428.65		614.341	1852.48		452.916	4061.2
78.641	2726.59		745.333	2765.95		292.537	2011.3		692.714	847.333		836.982	2179.93		-104.871	2452.3
-43.348	3119.65		1517.99	6262.66		5.015	1463.42		918.178	2065.44		805.284	2199.66		237.371	3768.11
-164.386	3096.54		1103.56	3917.97		128.613	1378.33		105.91	3959.29		301.718	2014.48		163.479	4944.72
1.803	2979.4		1775.64	1837.61		-306.473	1224.58		148.911	2268.29		-116.678	1538.25		432.249	3629.84
-326.404	3715.95		1393.82	1538.58		-16.291	1958.99		764.935	2747.15		136.397	1572.9		412.648	1387.79
86.881	3046.83		1929.51	2449.54		103.718	1375.6		123.086	2478.23		113.001	3481.93		1061.97	4342.16
117.343	3436.3		717.852	3806.92		110.5	1639.09		1053.24	2639.27		-27.796	3488.56		187.714	3505.14
176.857	1785.86		569.095	4678.33		709.933	945.719		489.241	2484.55		133.648	1956.1		981.593	4245.28
167.051	3087.72		-610.289	5204.5		686.346	767.917		172.216	3229.72		295.427	1697.76		78.999	4545.55
43.343	2461.68		2289.62	4719.14		252.082	2801.65		548.365	2655.06		207.27	2304.67		648.064	5152.11
472.94	3042.77		5041.5	20164.9		137.599	1561.48		11.134	2902.09		519.99	3614.94		1500.52	196.258
-24.228	2503.58		3255.18	8424.47		98.553	1974.55		106.986	4572.49		476.795	2730.22		377.637	3051.85
67.454	3300.31		2110.91	3977.67		115.25	1959.06		-138.864	3706.23		589.814	2600.1		13.992	1854.02
1826.1	2527.98		806.198	4985.77		109.792	1682.29		76.725	2891.32		520.496	2996.07		458.264	2834.74
-49.137	3748.01		2149.87	2987.15		381.64	1606.24		1092.28	3079.37		127.154	1758.27		834.968	3928.35
31.3	5214.35		1487.51	2949.13		506.891	1839.91		-101.151	3938.23		-99.834	2792.17		348.39	3734.39
196.443	4321.78		127.304	6175.61		152.519	2099.68		-38.167	4517.55		855.354	2303.21		599.826	2608.92
180.389	4938.29		4080.59	6874.99		55.599	1349.34		237.685	3781.97		271.436	1863.41		-76.797	3038.85
-314.04	3689.25		48.099	12124.9		70.504	2096.69		434.216	2498.45		149.317	3819.22		-64.347	1700.22
1026.66	1147.21		601.344	2498.32		151.447	1742.18		1269.78	2653.66		-24.979	1581.69
-455.583	3111.39		1756.44	2946.44		128.106	1767.56		-485.008	2358.37		471.565	2156.35
76.208	3527.09		187.432	7599.93		573.022	1751.21		1237.58	3085.39		686.123	1850.36
1323.3	2011.78		185.863	6240.58		19.878	1364.76		351.539	3730.63		336.459	959.245
99.518	2865.9		1726.57	3209.47		57.936	1440.77		946.536	2373.87		397.86	2191.79
-288.483	2551.66		521.674	2456.29		534.908	1244.91		14.713	2835.19		34.655	1268.08
77.095	2348.48		1360.42	6642.16		716.291	1281.74		1169.29	2889.43		235.658	1786.75
126.203	2719.63		429.422	4162.09		206.201	2092.92		-169.704	3712.58		33.467	2089.56
759.403	1765.57		1318.76	3813.62		50.151	1837.63		168.404	3337.24		1062.05	2792.13
36.109	6310.3		953.169	6016.24		129.683	492.111		-89.247	3547.11		719.967	2319.44
187.187	2625.04		1824.05	6807.1		92.828	1041.18		52.439	3802.25		766.261	2851.74
65.676	3024.01		-94.491	4153.22		33.196	1945.93		183.724	3332.03		472.364	3139.51
-139.225	4150.27		2490.77	5809.27		134	1054.79		-288.328	3055.93		863.483	3255.6
275.8	3798.42		97.465	5809.63		188.806	1490.69		-512.483	2726.23		588.561	1416.27
1664.52	2695.66		2696.53	3709.62		70.819	1594.77		-54.42	3451.77		379.35	3014.64
530.84	2575.24		393.385	7765.57		302.911	1927.12		147.322	3414.08		190.162	2863.4
55.916	5295.8		57.391	3772.6		129.888	1805.48		193.476	3138.83		622.49	3378.3
45.341	5375.6		248.827	7768.78		-93.3	1464.7		228.947	2973.09		394.658	2067.4
-84.418	3417.92		2353.12	3367.34		191.477	3291.93		38.748	3006.87		561.025	1276.71
82.755	5506.75		624.062	5072.59		93.044	1355.35		450.261	3009.24
73.177	3023.51		1921.31	2034.26		-406.625	2188.78		85.757	3319.33
-18.382	2587.33		813.354	4297.5		-425.69	1487.62		649.3	2522.44
-71.583	4448.85		12.271	6564.32		-198.929	1501.81		-278.312	2805.93
43.839	3562.15		1386.07	1859.28		-139.256	1377.48		148.122	3408.91
-299.823	3052.32		1674.81	4958.1		-64.497	1322.72		322.528	1999.24
-209.192	4648.76		1365.05	7473.43		519.451	1382.76		277.714	2738.33
75.755	4250.06		615.332	6389.43		-75.135	1917.91		533.425	2213.07
67.356	3239.43		245.365	3073.89		-573.753	1367.08		-650.746	2399.56
366.634	2972.13		243.785	6142.95		-98.906	1403.57		-8.966	2037.34
-76.073	2370.95		746.262	2448.52		-77.776	1744.51		162.897	2014.11
79.088	2109.9		431.772	5864.7		128.701	1999.94		8.104	2478.25
227.666	3028.02		1762.14	5591.97		28.626	2025.72		-16.5	1432.95
453.718	2410.79		326.554	3749.77		29.92	1911.54		-100.054	2605.71
-12.999	3269.26		743.571	3802.48		137.028	1532.41		45.819	2604.56
186.757	3385.64		1133.27	4475.84		201.82	1005.49		285.005	2494.17
-127.706	2714.25		3111.51	4002.51		75.144	1909.48		246.942	3216.54
-31.537	2185.08		998.953	3910.24					73.404	2485.83
-17.652	3669.59		2157.51	4574.46					369.25	2700.99
384.368	1943.51		1296.66	3701.8					210.073	2663.64
-330.874	1553.01		1231.37	3096.49					-49.324	1926.65
-152.247	1848.75		239.227	4866.32					328.219	2263.81
714.358	1561.19		1775.69	2761.36					20.533	2591.72
-383.167	2021.12		915.01	3840.77					-378.845	2680.18
1066.35	1198.25		2458.37	3078.87					380.853	1196.09
			1511.23	4174.59					63.52	2971.69
			-33.8	4334.65					-597.213	1461.05
			36.742	3728.46					96.416	2310.87
			191.965	3336.08					650.809	3417.05
			257.859	2506.74					-166.729	2614.25
			402.667	4148.55					-72.497	1941.88
			1532.98	3075.48					43.088	2275.59
			1591.33	3072.11
			-3.976	5696.79
			2040.49	2680.51
			1224.83	2503.85
			1311.88	4697.45
			-220.346	4208.08
			-196.059	4650.11
			1981.88	3151.76
			-648.87	4387.61
			1645.52	2042.49
			847.671	3532.05
			316.164	8441.09
			161.316	7539.05
			1181.15	2687.1
			446.892	4382.77
			854.396	6755.61
			116.327	3410.18
			1475.18	1505.75
			32.5	4937.79
			1117.8	1961.23
			900.806	3798.69
			1514.93	3475.36
			602.242	2023.67
			-120.6	3705.09
			1309.86	4861.64
			-318.376	4139.55
			812.512	2070.96
			176.886	4043.48

## Sheet: Anova Tem1
Number of families	1
Number of comparisons per family	6
Alpha	0.05
Uncorrected Fisher's LSD	Mean Diff,	95,00% CI of diff,	Below threshold?	Summary	Individual P Value
WT mSPB vs. WT dSPB	-2103	-2336 to -1871	Yes	****	<0,0001	A-B
WT mSPB vs. bud14∆ mSPB	-89.92	-330,2 to 150,4	No	ns	0.4621	A-C
WT mSPB vs. bud14∆dSPB	-3127	-3368 to -2887	Yes	****	<0,0001	A-D
WT dSPB vs. bud14∆ mSPB	2014	1773 to 2254	Yes	****	<0,0001	B-C
WT dSPB vs. bud14∆dSPB	-1024	-1264 to -783,7	Yes	****	<0,0001	B-D
bud14∆ mSPB vs. bud14∆dSPB	-3037	-3286 to -2789	Yes	****	<0,0001	C-D
Test details	Mean 1	Mean 2	Mean Diff,	SE of diff,	n1	n2	t	DF
WT mSPB vs. WT dSPB	327.3	2431	-2103	118	88	88	17.83	326
WT mSPB vs. bud14∆ mSPB	327.3	417.2	-89.92	122.1	88	77	0.7362	326
WT mSPB vs. bud14∆dSPB	327.3	3455	-3127	122.1	88	77	25.6	326
WT dSPB vs. bud14∆ mSPB	2431	417.2	2014	122.1	88	77	16.49	326
WT dSPB vs. bud14∆dSPB	2431	3455	-1024	122.1	88	77	8.383	326
bud14∆ mSPB vs. bud14∆dSPB	417.2	3455	-3037	126.1	77	77	24.08	326

## Sheet: Anova Bub2
Number of families	1
Number of comparisons per family	6
Alpha	0.05
Uncorrected Fisher's LSD	Mean Diff,	95,00% CI of diff,	Below threshold?	Summary	Individual P Value
WT mSPB vs. WT dSPB	-2103	-2336 to -1871	Yes	****	<0,0001	A-B
WT mSPB vs. bud14∆ mSPB	-89.92	-330,2 to 150,4	No	ns	0.4621	A-C
WT mSPB vs. bud14∆dSPB	-3127	-3368 to -2887	Yes	****	<0,0001	A-D
WT dSPB vs. bud14∆ mSPB	2014	1773 to 2254	Yes	****	<0,0001	B-C
WT dSPB vs. bud14∆dSPB	-1024	-1264 to -783,7	Yes	****	<0,0001	B-D
bud14∆ mSPB vs. bud14∆dSPB	-3037	-3286 to -2789	Yes	****	<0,0001	C-D
Test details	Mean 1	Mean 2	Mean Diff,	SE of diff,	n1	n2	t	DF
WT mSPB vs. WT dSPB	327.3	2431	-2103	118	88	88	17.83	326
WT mSPB vs. bud14∆ mSPB	327.3	417.2	-89.92	122.1	88	77	0.7362	326
WT mSPB vs. bud14∆dSPB	327.3	3455	-3127	122.1	88	77	25.6	326
WT dSPB vs. bud14∆ mSPB	2431	417.2	2014	122.1	88	77	16.49	326
WT dSPB vs. bud14∆dSPB	2431	3455	-1024	122.1	88	77	8.383	326
bud14∆ mSPB vs. bud14∆dSPB	417.2	3455	-3037	126.1	77	77	24.08	326

## Sheet: Anova Bfa1
Number of families	1
Number of comparisons per family	6
Alpha	0.05
Uncorrected Fisher's LSD	Mean Diff,	95,00% CI of diff,	Below threshold?	Summary	Individual P Value
WT mSPB vs. WT dSPB	-1635	-1795 to -1475	Yes	****	<0,0001	A-B
WT mSPB vs. bud14∆ mSPB	-60.61	-215,2 to 93,94	No	ns	0.4413	A-C
WT mSPB vs. bud14∆dSPB	-2547	-2702 to -2393	Yes	****	<0,0001	A-D
WT dSPB vs. bud14∆ mSPB	1575	1420 to 1729	Yes	****	<0,0001	B-C
WT dSPB vs. bud14∆dSPB	-912.2	-1067 to -757,6	Yes	****	<0,0001	B-D
bud14∆ mSPB vs. bud14∆dSPB	-2487	-2636 to -2338	Yes	****	<0,0001	C-D
Test details	Mean 1	Mean 2	Mean Diff,	SE of diff,	n1	n2	t	DF
WT mSPB vs. WT dSPB	222.9	1858	-1635	81.38	105	105	20.09	448
WT mSPB vs. bud14∆ mSPB	222.9	283.6	-60.61	78.64	105	121	0.7708	448
WT mSPB vs. bud14∆dSPB	222.9	2770	-2547	78.64	105	121	32.39	448
WT dSPB vs. bud14∆ mSPB	1858	283.6	1575	78.64	105	121	20.02	448
WT dSPB vs. bud14∆dSPB	1858	2770	-912.2	78.64	105	121	11.6	448
bud14∆ mSPB vs. bud14∆dSPB	283.6	2770	-2487	75.81	121	121	32.8	448
