# Supplementary material for: Protein phosphatase 1 in association with Bud14 inhibits mitotic exit in Saccharomyces cerevisiae
Source: eLife. 2021 Oct 11;10:e72833. doi: 10.7554/eLife.72833 (PMC8577847; doi:10.7554/eLife.72833)
Supplement: Figure 6—figure supplement 1—source data 4. [file elife-72833-fig6-figsupp1-data4.xlsx]

## Sheet: data
Misalignment									Normal
wt			kin4del			bud14del			wt			kin4del			bud14del
dSPB	mSPB		dSPB	mSPB		dSPB	mSPB		dSPB	mSPB		dSPB	mSPB		dSPB	mSPB
1434.6	953.6		1798.44	609		3777.04	563.4		3882.2	169.56		4169.2	1912.76		4726.68	2419.48
349.88	220.24		4325.96	1359.92		4571.72	938.84		3865.84	634.2		3437.84	2182.08		5662.44	2320.76
236.52	218.32		2999.4	877.36		4731.32	2239.36		3928.68	532.96		5137.04	1707.84		3468.52	3117.64
963.88	847.04		1891.52	264.24		7075.64	2589.56		4389.88	1560.32		4688.12	1234.8		5033.6	2160.84
1822.92	362.28		2422.88	6.32		2530.76	886.88		4959.52	549.24		3343.16	1443		3325.36	143.64
1581.36	329.32		3162.6	712.52		4836.96	1890.48		2488.16	1054.04		5487.36	614.68		11288.7	1511.24
1382.32	589.92		4985.36	555.28		4289.88	1587.96		2141.72	851.6		4749.04	491.24		3824.16	3444.6
1905.56	1512.72		1664.36	713.32		18432	2805.44		3407.24	481.16		3200.64	1890.16		4107.88	783.2
1124.12	776.92		2755.84	2369.24		810.56	707.96		2022.2	1579.88		2514.68	751.68		5175.56	1346.84
2338.12	808.24		2457.64	706.12		2099.12	736.72		3006.72	1196.12		2574.72	11.28		6807.84	1417.84
315.48	249.56		1040.8	937.16		420.64	209.32		2596.88	1548.84		4175.04	1975.12		5306.76	2566.08
723.44	200.2		1373.52	210.56		4877.76	547.92		1940.56	894.76		2499.64	556.36		4617.64	3397.04
537	421.4		2362.44	190.28		5360.88	1234.04		2432.8	1478.6		3390.04	1089.96		15009.3	1486.6
1771.12	1639.48		1845.32	169.8		1928.72	1667.72		5632.12	269.44		2721.92	1749.68		4416.48	1684.76
357.08	71.72		2161.36	1607.2		723.88	24.8		1703.4	960.84		8687.24	2778.68		7032.36	1861.44
527.44	379.16		1083.36	348.44		1565.2	163.28		2812.92	787.16		4662.96	981.52		3542.8	3215.92
2922.24	136.52		1885.92	796.76		2608.32	628.56		2398.68	491.72		3223.96	2455		8766.6	1673.32
425.28	317.88		3903.6	1213.92		1064.84	577.84		2958.24	1846.88		2835.72	747.36		6980.88	1334.08
280.68	194.04		2934.72	1093.6		2227.92	2135.88		2326.48	1115		1689.76	1024.16		5012.84	1857.48
2063.52	814.2		904	757.04		1794.44	1445.04		4235.24	813.16		2288.92	414.8		4566.36	3276.16
307.16	216.32		2252.6	96.28		1892.08	1672.16		3571.76	1163.16		6314	235.76		2992.28	1320.56
1988.08	881		973.6	369.76		2609.6	2342.96		2558.52	917.16		3919.2	465		8970.08	1436.28
1813.56	916.44		4811.28	1030.08		1857.96	1049.28		2354.24	400.52		2996.44	1534.2		5632.8	1929.16
323.44	74.88		1944.6	1671.32		5918.76	391.72		2906.2	1659.8		2593.24	1618.92		5806.48	736.6
651.4	295.76		2564.44	83.88		6259.52	4351.04		2292.88	621.44		2623.04	1738.08		4031.88	507.76
1010.56	229.44		1989.76	644.6		2252.6	91.12		3481.48	1291.36		2936.56	1903.08		7121.96	611.72
1280.88	611.8		2334.04	351.28		3603.84	768.56		3349.84	2712.16		2226.6	1302.56		3953.6	226.96
865.44	261.04		1904.32	325.4		2160.04	1141.2		4383.96	1307.44		2927.24	1135.8		12999.4	2832.68
571.2	103.48		1523.2	379.8		449.88	310.2		6421	2309.32		1254.84	186.48		3443.84	577.56
1033.08	394.04		883.36	242.64		6173.96	668.76		3653.8	662.76		3110.44	1062.24		5206.24	4719.72
1159.24	796.36		2268.4	511.8		1175.88	738.32		3051.56	1119.36		4984.08	857.28		2861.72	725.68
1214.2	58.08		2235.56	1216.32		4045.76	136.68		3671.44	2493.2		2355.16	1271.2		3644.48	1246.84
416.96	225.08		1499.08	735.4		693.92	367.2		3105.2	929.96		1384.6	1052.52		4439.96	2496.48
2730.68	857.56		3399.6	250.8		3557.28	3102.2		3187.56	1579.76		2577.12	334.92		8339.76	1580.8
623.04	454.6		3214.4	16.16		1321.04	163		2697.56	750.96		5477.64	622.48		4457.96	984.52
1594.12	227.08		2460.8	51.32		3239.48	788.64		3070.48	985.36		3032.36	987.64		5307.48	605.28
945.52	119.2		1521.84	274.08		1247.24	289.36		3822.56	1297.28		3818.32	1675.32		4280.96	290.36
787.84	441.36		1473.2	475.24		3618.28	2239.4		2532.12	405.96		675	399.32		4916.64	432.48
1621.24	240.48		1061.48	956.8		7504.04	1126.28		1709.2	625.6		1674.84	1280.08		3719.32	818.52
69.92	52.12		1384.6	1052.52		1360.96	671.56		857.84	343.84		4222.36	544.4		5246.84	405.8
351.64	105.24		1202.08	162.72		2527	297.12		3915.44	653.2		3235.88	1419.92		4719.12	1658.12
5004.12	917.8		1253.8	773.68		7379.04	361.48		3312.6	195.32		2280.32	1658.96		9983.6	2382.6
			2507.12	895.72					2275.8	1124.4		2593.4	2061.64		10405.3	1843.12
			3198.08	124.6					2446.16	987.72		4679.96	1926.36		4135.44	2369.12
			1831.4	930.28					1887.08	837.24		4298.92	1398.72		5851.04	1003.32
			3792.4	771.08					2850.24	874.44		2485.24	334.6		6196.76	1129.6
			3308.6	748.2					2457.44	1535.48		3148.48	921.32		4394.48	1134.64
			2136.84	525.32					2919.76	862.24		2840.04	675.6		8263.6	3842.76
			1188.64	342.48					3281.64	367.88		3673.68	1708.76		6400.32	1033.76
			1055.88	91.72					1889.8	970.08					4807.84	1369.04
			1066.48	549.56					4233.44	644.96					5704.88	772.04
			2777.16	198.84					1139.32	912.36					6747.72	3137.72
			1942.92	1229.48					1793.76	913.6					4814.88	369.12
			1506.56	770.52					1677.2	1236.4					3963.28	1289.36
			1642.4	1272.12					3132.84	784.84					4614.84	1313.24
			334.8	332.32					3080.72	1031.4					7504.04	1126.28
			988.64	453.56					3003.76	1251.8					5054.72	604.72
			2448.52	121.2											2693.96	2215.4
			2026.52	1084.68											925.835	110.125
			801.28	529.48											5660.2	628.68
			1111.12	533.12
			2299.32	745.36
			707.2	477.4
			2850.04	2623.16

## Sheet: anova normal aligned
Number of families	1
Number of comparisons per family	15
Alpha	0.05
Uncorrected Fisher's LSD	Mean Diff,	95,00% CI of diff,	Below threshold?	Summary	Individual P Value
wt vs. wt	1992	1483 to 2501	Yes	****	<0,0001	A-B
wt vs. kin4del	-382.1	-911,3 to 147,0	No	ns	0.1563	A-D
wt vs. kin4del	1812	1282 to 2341	Yes	****	<0,0001	A-E
wt vs. bud14del	-2646	-3149 to -2144	Yes	****	<0,0001	A-G
wt vs. bud14del	1421	918,8 to 1924	Yes	****	<0,0001	A-H
wt vs. kin4del	-2374	-2903 to -1845	Yes	****	<0,0001	B-D
wt vs. kin4del	-180.2	-709,4 to 348,9	No	ns	0.5033	B-E
wt vs. bud14del	-4638	-5140 to -4136	Yes	****	<0,0001	B-G
wt vs. bud14del	-570.5	-1073 to -68,15	Yes	*	0.0262	B-H
kin4del vs. kin4del	2194	1645 to 2742	Yes	****	<0,0001	D-E
kin4del vs. bud14del	-2264	-2787 to -1741	Yes	****	<0,0001	D-G
kin4del vs. bud14del	1803	1280 to 2326	Yes	****	<0,0001	D-H
kin4del vs. bud14del	-4458	-4981 to -3935	Yes	****	<0,0001	E-G
kin4del vs. bud14del	-390.3	-913,3 to 132,7	No	ns	0.143	E-H
bud14del vs. bud14del	4068	3572 to 4563	Yes	****	<0,0001	G-H
Test details	Mean 1	Mean 2	Mean Diff,	SE of diff,	n1	n2	t	DF
wt vs. wt	3002	1010	1992	258.6	57	57	7.701	326
wt vs. kin4del	3002	3384	-382.1	269	57	49	1.421	326
wt vs. kin4del	3002	1190	1812	269	57	49	6.735	326
wt vs. bud14del	3002	5648	-2646	255.4	57	60	10.36	326
wt vs. bud14del	3002	1581	1421	255.4	57	60	5.565	326
wt vs. kin4del	1010	3384	-2374	269	57	49	8.826	326
wt vs. kin4del	1010	1190	-180.2	269	57	49	0.67	326
wt vs. bud14del	1010	5648	-4638	255.4	57	60	18.16	326
wt vs. bud14del	1010	1581	-570.5	255.4	57	60	2.234	326
kin4del vs. kin4del	3384	1190	2194	278.9	49	49	7.864	326
kin4del vs. bud14del	3384	5648	-2264	265.8	49	60	8.517	326
kin4del vs. bud14del	3384	1581	1803	265.8	49	60	6.783	326
kin4del vs. bud14del	1190	5648	-4458	265.8	49	60	16.77	326
kin4del vs. bud14del	1190	1581	-390.3	265.8	49	60	1.468	326
bud14del vs. bud14del	5648	1581	4068	252.1	60	60	16.14	326

## Sheet: anova misaligned
Number of families	1
Number of comparisons per family	15
Alpha	0.05
Uncorrected Fisher's LSD	Mean Diff,	95,00% CI of diff,	Below threshold?	Summary	Individual P Value
wt vs. wt	1992	1483 to 2501	Yes	****	<0,0001	A-B
wt vs. kin4del	-382.1	-911,3 to 147,0	No	ns	0.1563	A-D
wt vs. kin4del	1812	1282 to 2341	Yes	****	<0,0001	A-E
wt vs. bud14del	-2646	-3149 to -2144	Yes	****	<0,0001	A-G
wt vs. bud14del	1421	918,8 to 1924	Yes	****	<0,0001	A-H
wt vs. kin4del	-2374	-2903 to -1845	Yes	****	<0,0001	B-D
wt vs. kin4del	-180.2	-709,4 to 348,9	No	ns	0.5033	B-E
wt vs. bud14del	-4638	-5140 to -4136	Yes	****	<0,0001	B-G
wt vs. bud14del	-570.5	-1073 to -68,15	Yes	*	0.0262	B-H
kin4del vs. kin4del	2194	1645 to 2742	Yes	****	<0,0001	D-E
kin4del vs. bud14del	-2264	-2787 to -1741	Yes	****	<0,0001	D-G
kin4del vs. bud14del	1803	1280 to 2326	Yes	****	<0,0001	D-H
kin4del vs. bud14del	-4458	-4981 to -3935	Yes	****	<0,0001	E-G
kin4del vs. bud14del	-390.3	-913,3 to 132,7	No	ns	0.143	E-H
bud14del vs. bud14del	4068	3572 to 4563	Yes	****	<0,0001	G-H
Test details	Mean 1	Mean 2	Mean Diff,	SE of diff,	n1	n2	t	DF
wt vs. wt	3002	1010	1992	258.6	57	57	7.701	326
wt vs. kin4del	3002	3384	-382.1	269	57	49	1.421	326
wt vs. kin4del	3002	1190	1812	269	57	49	6.735	326
wt vs. bud14del	3002	5648	-2646	255.4	57	60	10.36	326
wt vs. bud14del	3002	1581	1421	255.4	57	60	5.565	326
wt vs. kin4del	1010	3384	-2374	269	57	49	8.826	326
wt vs. kin4del	1010	1190	-180.2	269	57	49	0.67	326
wt vs. bud14del	1010	5648	-4638	255.4	57	60	18.16	326
wt vs. bud14del	1010	1581	-570.5	255.4	57	60	2.234	326
kin4del vs. kin4del	3384	1190	2194	278.9	49	49	7.864	326
kin4del vs. bud14del	3384	5648	-2264	265.8	49	60	8.517	326
kin4del vs. bud14del	3384	1581	1803	265.8	49	60	6.783	326
kin4del vs. bud14del	1190	5648	-4458	265.8	49	60	16.77	326
kin4del vs. bud14del	1190	1581	-390.3	265.8	49	60	1.468	326
bud14del vs. bud14del	5648	1581	4068	252.1	60	60	16.14	326
