# Supplementary material for: Protein phosphatase 1 in association with Bud14 inhibits mitotic exit in Saccharomyces cerevisiae
Source: eLife. 2021 Oct 11;10:e72833. doi: 10.7554/eLife.72833 (PMC8577847; doi:10.7554/eLife.72833)
Supplement: Figure 6—figure supplement 2—source data 1. [file elife-72833-fig6-figsupp2-data1.xlsx]

## Sheet: Data metafaz
WT	kin4Δ	bfa1Δ	bud14Δ	kin4Δbud14Δ
851.933	1048.74	-490.841	56.014	-755.046
-1063.97	-1799.93	725.278	-839.146	-626.51
-936.061	832.486	1568.08	-93.76	-1101.02
-709.69	-2551.44	1709.77	-1018.63	-4124.8
-1309.58	-16.896	326.052	-507.382	573.127
-212.981	-121.807	-436.873	-523.101	-466.649
-312.307	-1581.6	-748.79	-31.2	815.342
-145.057	-943.336	567.137	-960.243	-455.855
768.452	703.562	-66.231	-405.46	-1971.94
-808.662	-4275.79	1431.57	-1285.54	-330.946
-752.823	494.453	85.905	42.436	553.146
-1361.51	1179.15	-521.858	-1759.31	-107.161
922.054	1202.89	477.926	180.417	1116.31
-858.4	-1117.45	-179.66	-441.817	228.334
282.31	216.183	1218.44	193.633	622.45
-924.559	-1468.08	5.447	-1271	-657.429
-769.091	1829.73	-268.332	-437.195	418.026
-336.199	-932.206	78.009	-1769.15	-1582.62
645.423	1382.3	1975.87	57.197	491.18
-290.739	-1708.44	1400.21	-1373.77	984.072
418.496	1129.08	875.791	493.647	169.569
-1392.68	-2057.84	811.272	1285.89	-218.498
-1100.66	-377.315	-351.7	-394.087	503.578
99.686	-1956.29	56.507	-1115.4	-1751.87
-424.859	537.105	536.549	806.511	-600.946
-1259.81	1291.59	883.941	186.926	-880.211
-661.55	212.792	1281.62	412.788	-11.836
-517.279	-1563.23	829.303	-627.397	-2019.83
-346.417	984.119	973.947	-812.822	-379.981
-742.614	-1068.44	1206.35	103.427	-437.5
-193.355	-227.72	1174.4	-619.899	528.631
125.538	-157.122	-77.509	-815.054	-1296.42
394.102	-99.129	788.149	-40.94	0.762
-495.358	-917.302	1160.68	-752.903	1426.33
-1660.95	1025.44	1494.44	-768.643	-178.862
-166.611	-1107.02	1049.39	-273.095	42.214
648.118	-298.474	1310.68	147.257	-644.596
-211.891	-1277.8	677.396	-1304.75	-716.474
-298.4	128.237	93.307	-438.809	304.783
-539.718	-414.818	-752.874	469.349	28.201
122.926	-855.152	414.461	529.128	392.672
-51.287	-1634.12	-513.135	-554.592	-1189.29
-2373.61	-202.578	-395.872	-398.8	1245.81
47.821	-663.756	-775.602	-1888.06	-1008.63
267.071	1771.86	-91.997	403.666	8.092
-765.025	-2139.66	147.492	-237.138	-753.224
-237.884	366.678	-738.25	-1198.76	527.868
-809.481	-1012.74	846.373	-201.597	-61.77
-633.134	-2285.81	676.559	553.941	7.268
-613.375	-433.232	-281.698	-706.74	-45.026
-469.906	148.091	-263.075	387.666	-903.824
-1118.38	-312.858	-449.358	-989.18	517.935
-628.753	1395.73	5.45	-763.149	388.871
38.098	-1434.93	56.813	-1897.44	459.183
409.985	598.754	-740.3	112.695	-31.82
-617.748	-1532.69	-1260.05	-196.75	-1309.3
105.046	826.798	495.492	157.641	26.867
-442.37	-448.965	-950.265	-827.357	-159.178
-428.616	286.9	265.189	162.345	179.122
-1938.32	-609.411	167.086	-539.381	-1306.26
616.983	-665.087	619.905	-803.892	487.44
-878.305	194.619	-794.735	195.846	-186.764
7.454	15.341	33.492	-166.362	109.693
-1252.06	-55.797	120.616	-1432.16	52.906
309.238	422.883	45.328	-15.106	387.206
-1522.24	-964.608	373.152	-614.394	-56.731
250.391	-133.026	-508.885	616.523	814.719
-1505.61	-415.876	708.479	-2063.64	-1274.16
-1537.99	-431.522	-128.469	694.19	20.899
353.788	-820.75	-815.223	-544.839	-817.086
-1064.92	-301.839	-891.473	-196.317	-113.362
-422.779	-1219.8	-584.34	-496.691	-1375.99
-594.191	177.36	-334.485	-306.718	-691.445
-1458.51	-989.079	-1340.76	-1250.52	-1200.37
376.79	29.728	-169.011	497.887	215.314
-511.873	-882.384	-180.563	-607.15	-1095.54
-529.476	-956.033	-682.469	137.604	534.485
-676.551	-302.671	303.175	-1334.68	-652.611
576.546	-20.727	167.636	-41.195	-746.227
363.634	-1392.59	-57.363	628.477	46.009
965.111	100.983	609.217	-470.639	-628.143
-585.733	-1558.71	-1144.74	-1363.43	-814.7
343.331	-45.765	-772.262	-289.241	-1189.37
-510.63	-893.815	-555.663	-656.086	-673.054
1107.65	-13.822	371.921	412.055	108.725
41.352	-363.833	-550.721	-493.176	-1781.51
685.089	911.512	462.707	334.508	-195.96
153.221	-332.589	195.968	-696.602	525.15
-305.09	126.168	141.254	310.149	172.873
-695.245	-1327.19	-1184.26	-448.831	-1029.58
286.928	-78.29	329.261	-2059.86	327.248
-882.081	-1218.59	-462.387	-1618.54	-84.013
-274.9	119.48	327.847	-687.616	-395.996
-1721.99	-2009.06	386.111	-57.16	-638.411
-377.603	-355.408	452.212	752.872	72.073
-692.05	-1009.38	-708.853	-209.821	-2002.24
-356.616	721.976	2633	151.897	-922.536
-911.624	-2848.28	-93.317	-1217.24	-1169.69
534.396	757.141	993.559	-186.933	-409.675
-770.662	1373.92	1207.8	-1362.88	388.483
317.378	16.342	46.807	-1094.82	-3428.63
-776.317	-591.373	-324.119	-322.913	30.083
446.822	570.568	687.567	-2242.27	534.714
-949.098	-1185.63	-159.873	-1005.6	-796.996
-1316.69	-613.919	6.738	-246.176	1630.93
-41.103	-2541.9	-598.205	326.932	-1206.94
-1572.85	818.167	-306.056	581.055	1420.28
508.054	502.983	-1387.88	282.792	454.133
-235.212	322.747	199.224	-1830.98	355.042
-416.621	-139.42	1034.38	-565.548	-150.845
309.438	929.611	536.538	968.738	-389.879
279.226	-1525.72	1493.09	-163.589	528.809
-126.943	391.139	1765.77	-263.662	-213.051
-1763.85	31.325	-141.082	169.813	-2987.69
310.28	1196.53	-1098.43	366.426	-165.587
-715.401	-1846.68	1659.23	-754.857	-1247.73
557.167	258.203	172.72	52.137	-353.371
-1330.34	-614.113	-284.623	-1850.82	-778.114
-1263.41	-241.505	-828.377	674.064	414.818
160.645	-315.162	-1216.82	-565.687	-56.293
61.704	1180.41	-767.732	-1429.42	-1509.32
-191.018	-2359.26	-599.244	-921.77	-68.007
-4.37	-794.891	463.995	-1792.16	522.79
-1637.45	-1401.28	-293.681	851.017	-1734.42
69.121	402.35	202.973	-6.35	556.127
-680.126	-3277.75	-947.176	-1196.7	-2107.67
-876.219	-1423.92	485.819	297.229	806.379
-504.473	151.054	-129.767	-1135.84	-1043.7
16.662	1136.42	376.236	620.014	-791.261
-1268.27	205.424	1189.42	875.501	-251.957
257.709	-1505.76	27.215	210.062	526.982
-1676.35	571.192	-1147.25	-3387.13	-43.001
206.519	32.338	-289.165	1235.08	-326.086
-510.021	-2029.31	-523.402	-2825.26	-2387.03
518.004	-1261.2	-1095.23	-576.04	-298.519
-302.135	-267.17	-307.002	69.716	-716.03
-57.456	200	-48.235	258.658	37
-1058.64	-1899.34	-769.267	-2598.92	-1835.74
145.607	-1121.97	-228.738	630.146	-34.952
-995.765	-1119.03	140.344	753.944	228.852
125.669	206.529	239.001	-88.49	-183.858
-1762.6	1597.55	460.544	-1565.03	-820.527
-1118.36	524.747	-1335.89	81.535	274.481
5.98	258.855	-562.394	-636.955	-2589.41
70.55	-1180.24	722.85	64.587	-30.62
-363.456	147.784	-863.488	-3149.53	-1931.36
-572.712	778.658	-108.092	1360.8	115.023
-1247.4	-127.266	-286.149	-442.907	-1331.57
-34.328	-355.769	909.992	183.273	675.359
-482.425	-539.777	-245.234	-3420.64	-393.417
318.163	339.931	131.101	1094.73	-384.2
-487.714	-1275.58	578.472	-1492.2	-1536.56
-736.65	-2372.7	337.792	-961.438	-376.147
-318.649	-451.965	-183.974	-3954.42	-737.328
33.858	-689.914	-292.338	798.854	761.299
-770.276	-1191.65	737.952	-785.73	-1969.14
-924.795	265.381	27.283	7.228	-303.044
-989.226	-43.02	-701.998	-1108.38	-159.898
-371.598	428.556	-558.687	250.002	548.702
34.768	-309.887	141.037	1013.4	-1835.7
-772.363	-68.706	352.871	-432.851	476.615
156.554	-1703.02	838.257	-11.726	-489.944
620.366	287.531	862.585	-220.806	768.06
-896.257	-1142.4	-96.584	-382.309	120.778
-1843.89	-98.851	108.705	91.373	-265.802
104.835	-1102.48	224.528	291.511	-1352.11
-550.307	-159.233	830.573	127.677	462.494
-20.525	-607.662	986.59	-1676.5	-1305.76
292.942	-73.318	-73.247	-1349.59	-903.973
-23.43	-204.475	-302.286	-759.129	-90.174
-290.071	688.411	647.985	-194.876	1329.2
-1228.27	541.692	1005.92	-1036.51	990.464
366.566	1202.56	45.33	830.373	-455.013
-223.815	-734.355	-1434.1	45.491	-652.263
235.619	578.224	434.968	-485.404	133.086
-781.105	-1101.27	668.17	-492.743	-1623.92
-114.011	237.71	78.775	144.702	424.678
-1112.54	-105.428	659.976	-1747.54	1369.38
192.342	255.245	-80.255	658.102	-789.904
-522.911	-1518.02	-212.951	-1567.53	571.338
257.371	-71.964	265.804	-88.587	-526.525
-1261.19	-530.105	-435.611	-532.972	-1255.55
-994.098	74.85	434.968	-126.342	304.418
-218.783	693.531	712.152	-1691.24	273.559
-412.088	-243.294	679.27	159.993	518.155
-734.561	-1549.74	-287.386	-80.368	282.48
-223.522	664.836	1932.85	-309.092	822.945
-1286.42	-1155.93	-527.416	-635.014	567.769
974.638	109.254	23.868	26.393	-939.506
-949.719	-711.591	-427.203	-991.094	-566.855
737.199	44.006	-132.868	-661.049	783.248
260.603	-1425.67	294.029	-453.232	-280.253
350.338	390.819	-412.449	-370.883	-303.872
-866.502	-641.597	-212.805	-2262.53	105.684
-363.645	315.34	-48.174	-1347.81	310.036
102.518	-126.517	-1619.95	-761.853	-758.459
-234.403	-13.058	-1105.21	-276.754	-201.965
223.657	172.99	-123.649	102.762	59.173
-286.024	-260.496	158.418	10.476	-33.796
-234.802	-453.637	205.002	-754.218	-1332.35
-751.658	221.524	743.139		-710.283
-508.848	127.004	1073.3		-898.419
		211.394		-222.408
		635.627		-391.598
		-95.446
		-1119.46
		213.397
		-40.228

## Sheet: Anova
Number of families	1
Number of comparisons per family	10
Alpha	0.05
Tukey's multiple comparisons test	Mean Diff,	95,00% CI of diff,	Below threshold?	Summary	Adjusted P Value
WT vs. kin4Δ	-31.5	-261,1 to 198,0	No	ns	0.9958	A-B
WT vs. bfa1Δ	-482.6	-710,5 to -254,7	Yes	****	<0,0001	A-C
WT vs. bud14Δ	71	-159,1 to 301,1	No	ns	0.917	A-D
WT vs. kin4Δbud14Δ	-58.71	-287,7 to 170,3	No	ns	0.9564	A-E
kin4Δ vs. bfa1Δ	-451.1	-679,0 to -223,2	Yes	****	<0,0001	B-C
kin4Δ vs. bud14Δ	102.5	-127,6 to 332,6	No	ns	0.7413	B-D
kin4Δ vs. kin4Δbud14Δ	-27.2	-256,2 to 201,8	No	ns	0.9976	B-E
bfa1Δ vs. bud14Δ	553.6	325,1 to 782,1	Yes	****	<0,0001	C-D
bfa1Δ vs. kin4Δbud14Δ	423.9	196,6 to 651,2	Yes	****	<0,0001	C-E
bud14Δ vs. kin4Δbud14Δ	-129.7	-359,3 to 99,85	No	ns	0.5339	D-E
Test details	Mean 1	Mean 2	Mean Diff,	SE of diff,	n1	n2	q	DF
WT vs. kin4Δ	-383.1	-351.6	-31.5	84	202	202	0.5304	1011
WT vs. bfa1Δ	-383.1	99.53	-482.6	83.39	202	208	8.184	1011
WT vs. bud14Δ	-383.1	-454.1	71	84.21	202	200	1.192	1011
WT vs. kin4Δbud14Δ	-383.1	-324.4	-58.71	83.79	202	204	0.9908	1011
kin4Δ vs. bfa1Δ	-351.6	99.53	-451.1	83.39	202	208	7.65	1011
kin4Δ vs. bud14Δ	-351.6	-454.1	102.5	84.21	202	200	1.721	1011
kin4Δ vs. kin4Δbud14Δ	-351.6	-324.4	-27.2	83.79	202	204	0.4591	1011
bfa1Δ vs. bud14Δ	99.53	-454.1	553.6	83.6	208	200	9.364	1011
bfa1Δ vs. kin4Δbud14Δ	99.53	-324.4	423.9	83.18	208	204	7.206	1011
bud14Δ vs. kin4Δbud14Δ	-454.1	-324.4	-129.7	84	200	204	2.184	1011
