# Supplementary material for: Protein phosphatase 1 in association with Bud14 inhibits mitotic exit in Saccharomyces cerevisiae
Source: eLife. 2021 Oct 11;10:e72833. doi: 10.7554/eLife.72833 (PMC8577847; doi:10.7554/eLife.72833)
Supplement: Figure 6—figure supplement 2—source data 2. [file elife-72833-fig6-figsupp2-data2.xlsx]

## Sheet: Data late anafaz
WT	kin4Δ	bfa1Δ	bud14Δ	kin4Δbud14Δ
910.753	1741.94	1640.43	3143.02	-2115.58
985.056	700.572	4334.86	2109.24	-1496.24
709.643	1549.39	-901.833	156.958	-1255.3
1179.83	-692.131	608.271	590.584	2100.91
1671.5	265.36	916.635	-54.353	30.716
2081.81	1333.4	2607.83	2962.38	-71.74
2226.05	-2394.47	1619.3	998.234	2559.62
2030.07	-3547.05	2786.51	2851.09	195.511
1281.97	1340.81	471.484	-1000.39	2994.96
962.127	1877.16	-471.678	-1012.24	2546.29
446.355	533.074	1734.05	1826.27	802.81
3952.04	1433.52	164.729	42.416	900.262
472.925	664.407	150.304	-270.253	-381.099
3829.2	-657.344	-626.357	968.645	252.416
-116.201	-264.224	-858.431	-519.689	2052.31
670.607	-1494.4	-749.95	833.514	4250.04
1477.08	1052.34	1426.93	2041.64	-398.37
1939.61	2207.88	713.386	3574.11	3734.95
1345.11	1341.56	937.725	-1967.59	-860.168
439.706	2761.44	-783.076	450.877	1224.19
1546.22	431.136	-569.877	1821.5	-694.374
806.122	3487.79	-204.238	1683.92	240.03
1330.13	621.611	-196.481	-101.429	600.092
2816.4	2663.79	295.881	1084.52	1706.86
1505.72	-66.49	-801.481	1458.67	251.573
602.141	-325.452	-810.663	916.341	4781.92
1479.66	2090.14	965.524	-1296.94	-1258.16
715.814	898.839	1666.2	1407.79	625.878
1018.3	1625.8	-378.095	351.77	1288.38
1488.92	1805.45	-605.472	1474.97	650.48
2502.48	764.059	1128.5	2003.5	855.438
2020.95	3735.02	324.301	1275.98	-377.734
2420.61	982.755	992.417	683.785	2523.79
1987.3	-2059.78	-688.209	807.781	5015.83
99.029	896.286	-20.856	-1986.96	1542.76
456.237	1044.68	1254.62	-2841.59	1552.72
565.1	-1366.21	-789.25	-318.885	755.404
406.154	-108.383	-789.27	-162.861	-870.679
312.16	1609.14	2219.41	-270.606	-1070.4
1477.86	470.203	965.011	1076.95	984.253
900.837	2017.85	306.06	1293.55	1884.92
1232.78	1710.24	777.674	3667.77	1877.77
493.5	682.023	1440.63	899.298	-441.542
68.955	1283.36	-757.397	2326.08	17.192
1077.88	-460.192	959.679	1023.04	2815.85
750.762	-666.64	4253.24	-11.702	348.677
609.238	2263.27	3203.4	1423.2	2058.48
1599.93	1116.93	2499.77	1809.82	1910.81
980.507	-270.714	1743.67	-678.35	-859.77
2345.86	127.254	3579.96	2314	363.488
-51.916	3212.11	331.472	-931.227	212.741
1048.81	1534.18	1271.18	479.098	1787.01
1171	2404.81	1452.5	-1919.63	1036.86
2049.14	2543.85	-267.817	413.558	-18.693
1167.09	-291.216	2500.01	2.452	1560.06
2248.12	395.994	2194.82	3671.84	2600.67
1759.47	-866.436	286.148	-662.186	265.769
-14.672	14.607	877.226	1125.37	990.366
-1263.84	1566.55	173.404	-1605.88	-59.748
123.34	743.325	2171.12	912.567	156.457
936.079	-1083.74	951.85	-1480.95	1999.94
1463.24	-119.535	634.592	-978.72	1749.24
253.478	1236.31	1546.71	704.181	-22.178
1835.87	2113.12	1196.97	4978.8	-299.879
2727.38	192.843	897.847	-107.868	1050.09
975.621	-691.783	5255.72	-1078.93	949.058
11.263	462.272	229.28	401.703	287.693
960.907	-1385.45	660.193	2133.28	1146.48
1893.09	-41.941	-872.884	408.116	47.062
761.231	2053.24	-1048.4	534.644	120.664
-183.279	-402.31	4339.88	189.05	1342.61
929.207	-8.689	2065.34	-1025.66	4017.87
1255.52	1365.44	1402.7	1696.51	1341.63
2015.05	2690.59	-538.685	2023	2756.34
977.782	1979.93	-1189.16	2108.67	3693.1
208.224	3727.03	978.287	2190.99	-49.167
1471.66	3317.11	468.18	2928.89	2486.94
1442.09	5380.51	2119.49	3616.86	-88.461
1476.98	1768.91	22.845	-549.968	291.815
1040.27	2480.8	628.997	1044.9	6422.02
1818.46	-1306.07	928.398	820.516	-1211.57
1939.31	-2259.96	2309.66	-9.355	-239.563
920.748	-1026.27	1003.61	832.785	3364.18
576.094	653.294	1698.34	5580.07	6394.58
605.531	2020.5		-145.51	2529.32
-869.471	2716.92		1886.18	4046.9
1502.84	2672.02		579.332	618.343
-747.134	699.022		1964.63	1995.87
1518.97	1672.29		603.684	-679.759
590.172	2086.33		3039.63	624.238
-527.125	505.643		1661.35	2050.1
-234.346	1318.78		1012.37	1751.43
396.605	1593.71		2405.78	1753.55
443.373	3598.7		1015.28	-12.239
169.677	-52.978		-1167.85	909.16
617.082	-400.134		3287.59	2440.3
1174.73	1510.7		1496.79	-648.115
290.426	976.234		779.226	941.106
385.15	2716.11		-209.041	-1420.48
2324.64	1482.71		1032.59	3139.49
140.316	1391.03		2887.19	170.8
2635.4	2113.57		1693.92	7498.6
839.947	2779.24		1733.66	2281.4
1550.29	1661.18		1027.09	3889.26
575.405	330.002		878.686	-1504.06
586.059	967.735		2949.68	1958.84
			353.071	-96.63
			423.738	1053
			2210.03	-138.308
			5943.79	1524.1
			1484.23	-274.598
			4521.71	1549.01
			-202.416	1547.13
			318.375	2638.93
			394.591	1909.85
			1030.55	2028.88
			2601.1	378.147
			3208.87	3670.31
			2424.62	683.817
			925.937	-297.555
				1588.16
				4771.12
				861.408
				905.329
				645.119
				261.301
				1277.04
				1152.53

## Sheet: Anova
Number of families	1
Number of comparisons per family	10
Alpha	0.05
Uncorrected Fisher's LSD	Mean Diff,	95,00% CI of diff,	Below threshold?	Summary	Individual P Value
WT vs. kin4Δ	99.57	-288,7 to 487,8	No	ns	0.6146	A-B
WT vs. bfa1Δ	190.4	-222,5 to 603,3	No	ns	0.3654	A-C
WT vs. bud14Δ	31.06	-345,7 to 407,8	No	ns	0.8714	A-D
WT vs. kin4Δbud14Δ	-129	-500,2 to 242,2	No	ns	0.4951	A-E
kin4Δ vs. bfa1Δ	90.82	-322,1 to 503,7	No	ns	0.6658	B-C
kin4Δ vs. bud14Δ	-68.52	-445,3 to 308,2	No	ns	0.7211	B-D
kin4Δ vs. kin4Δbud14Δ	-228.6	-599,8 to 142,6	No	ns	0.227	B-E
bfa1Δ vs. bud14Δ	-159.3	-561,4 to 242,8	No	ns	0.4367	C-D
bfa1Δ vs. kin4Δbud14Δ	-319.4	-716,3 to 77,50	No	ns	0.1145	C-E
bud14Δ vs. kin4Δbud14Δ	-160	-519,2 to 199,1	No	ns	0.3818	D-E
Test details	Mean 1	Mean 2	Mean Diff,	SE of diff,	n1	n2	t	DF
WT vs. kin4Δ	1076	976.1	99.57	197.6	106	106	0.5038	539
WT vs. bfa1Δ	1076	885.3	190.4	210.2	106	84	0.9058	539
WT vs. bud14Δ	1076	1045	31.06	191.8	106	120	0.1619	539
WT vs. kin4Δbud14Δ	1076	1205	-129	189	106	128	0.6826	539
kin4Δ vs. bfa1Δ	976.1	885.3	90.82	210.2	106	84	0.4321	539
kin4Δ vs. bud14Δ	976.1	1045	-68.52	191.8	106	120	0.3572	539
kin4Δ vs. kin4Δbud14Δ	976.1	1205	-228.6	189	106	128	1.21	539
bfa1Δ vs. bud14Δ	885.3	1045	-159.3	204.7	84	120	0.7784	539
bfa1Δ vs. kin4Δbud14Δ	885.3	1205	-319.4	202	84	128	1.581	539
bud14Δ vs. kin4Δbud14Δ	1045	1205	-160	182.8	120	128	0.8754	539
