# Supplementary material for: Protein phosphatase 1 in association with Bud14 inhibits mitotic exit in Saccharomyces cerevisiae
Source: eLife. 2021 Oct 11;10:e72833. doi: 10.7554/eLife.72833 (PMC8577847; doi:10.7554/eLife.72833)
Supplement: Figure 6—source data 1. [file elife-72833-fig6-data1.xlsx]

## Sheet: data
WT			bud14Δ
SPB1	SPB2		SPB1	SPB2
-299.913	1951.7		-432.457	10637.9
28.639	1527.42		51.067	6047.68
-490.439	2542.62		6.716	5126.61
-156.455	4405.37		217.686	4284.47
-331.226	5065.82		1459.19	8214.07
-306.143	4256.26		-630.862	7570.29
39.055	3566		-178.001	8136.95
-117.783	3694.18		-359.868	7205.25
-244.672	5224.56		-79.102	8064.56
-350.956	2399.51		-413.84	2156.87
-248.12	4781.53		-46.665	6813.3
-70.371	2975.48		-71.861	11359.9
-8.292	2654.88		176.401	4804.65
-121.066	4370.81		2436.12	7303.43
-112.106	3991.86		614.786	3952.48
-50.526	5751.67		-271.697	6708.72
-23.667	1834.08		-155.467	7608.52
-259.705	3592.12		-129.598	5310.82
-21.081	2538.23		849.683	5555.12
-77.352	3096.66		81.852	9515.49
-233.691	5048.39		-210.606	6565.6
-85.674	2941.76		-257.655	9913.47
136.808	5097.7		-135.985	12453.2
-215.919	5343.45		-710.633	7917.11
-281.239	3591.67		-219.886	11381.7
-376.17	3150.01		1041.06	6839.7
-162.012	3961.96		-422.405	7207.87
-55.706	5109.61		822.062	5885.84
-95.546	3423.97		-382.676	7525.47
-137.361	4491.8		1525.61	7610.28
-101.746	3437.05		68.269	6507
234.025	2213.43		731.19	7844.64
-293.255	3679.71		-351.277	6143.02
-111.401	6179.67		700.353	6720.84
44.219	2761.06		-230.992	7169.37
-254.095	2195.84		-177.849	3138.14
381.521	4459.98		1141.4	8568.78
-260.162	4319.01		-463.301	9027.37
-377.746	4157.66		-156.504	9176.35
-109.407	3427.74		-130.355	8789.86
-204.05	4871.65		637.016	5492.5
49.09	4472.24		207.136	7408.47
-82.137	4906.7		140.834	3018.14
-198.417	3793.21		284.468	4192.45
-199.886	4926.68		-114.413	7474.09
-49.144	1554.09		-381.436	3479.94
-244.299	3940.14		-21.161	4494.51
-151.586	4537.04		256.748	4564.24
-240.08	4473.71		-292.809	5167.44
-294.134	5265.38		-372.02	3167.63
-240.864	3936.3		361.017	6726.39
-315.433	6251.41		-457.346	7019.94
-237.548	4289.63		7.761	6712.1
-20.234	3212.15		-483.479	5094.94
-200.204	4630.15		-477.123	2821.06
-86.183	4739.29		-153.532	5091.44
-227.309	3292.59		-186.995	9407.13
-189.935	3771.57		-148.773	4777.45
-11.428	2877.26		107.903	7151.47
-94.849	3371.66		-402.056	5876.43
-222.916	2480.37		-264.905	6748.13
-162.234	3003.56		-139.09	5933.02
-121.615	4368.89		104.386	3196.53
-234.827	3290.27		-235.117	3362.68
100.552	1707.58		-28.166	2870.54
-135.699	3991.68		-252.423	7127.29
-110.946	2885.95		207.075	5109.19
-104.281	3410.5		32.527	5715.91
-218.385	2519.62		-101.388	8717.18
-243.918	2935.84		-205.836	4282.77
			-83.325	6895.83
			-56.062	5059.72
			-187.99	4643.82
			-258.491	4953.87
			-42.062	7890.33
			-392.402	9716.81
			-119.771	6838.46
			-244.963	4109.79
			1223.77	4644.63
			753.852	4112.61
			-259.605	4028.89
			54.088	4809.11
			64.691	4931
			418.023	7209
			-223.667	4171.22
			-306.665	5848.29
			73.273	3537.86
			-155.548	6891.17
			230.623	4259.68
			-188.112	4040.32
			-461.352	6066.95
			-56.431	4894.83
			-42.078	7572.1
			68.995	4991.25
			37.026	27290.9
			-451.608	7771.41
			-123.147	8189.92
			-755.009	14362.5
			-165.457	3860.48
			-203.554	7175.15
			367.481	8043.47
			11.6	4304.96
			564.225	3593.86
			128.297	7327.71
			314.246	4433.63
			218.506	2000.67
			-287.271	4833.3
			-435.445	6834.06
			-282.231	6532.94
			-356.869	4450.08

## Sheet: One way Anova
Number of families	1
Number of comparisons per family	6
Alpha	0.05
Uncorrected Fisher's LSD	Mean Diff,	95,00% CI of diff,	Below threshold?	Summary	Individual P Value
WT mSPB vs. WT dSPB	-3848	-4435 to -3261	Yes	****	<0,0001	A-B
WT mSPB vs. bud14Δ mSPB	-156.6	-687,9 to 374,8	No	ns	0.5627	A-D
WT mSPB vs. bud14Δ dSPB	-6524	-7055 to -5992	Yes	****	<0,0001	A-E
WT dSPB vs. bud14Δ mSPB	3691	3160 to 4223	Yes	****	<0,0001	B-D
WT dSPB vs. bud14Δ dSPB	-2676	-3207 to -2145	Yes	****	<0,0001	B-E
bud14Δ mSPB vs. bud14Δ dSPB	-6367	-6837 to -5898	Yes	****	<0,0001	D-E
Test details	Mean 1	Mean 2	Mean Diff,	SE of diff,	n1	n2	t	DF
WT mSPB vs. WT dSPB	-144.6	3703	-3848	298.4	71	71	12.89	360
WT mSPB vs. bud14Δ mSPB	-144.6	11.92	-156.6	270.2	71	111	0.5794	360
WT mSPB vs. bud14Δ dSPB	-144.6	6379	-6524	270.2	71	111	24.14	360
WT dSPB vs. bud14Δ mSPB	3703	11.92	3691	270.2	71	111	13.66	360
WT dSPB vs. bud14Δ dSPB	3703	6379	-2676	270.2	71	111	9.904	360
bud14Δ mSPB vs. bud14Δ dSPB	11.92	6379	-6367	238.7	111	111	26.68	360
