# Supplementary material for: Protein phosphatase 1 in association with Bud14 inhibits mitotic exit in Saccharomyces cerevisiae
Source: eLife. 2021 Oct 11;10:e72833. doi: 10.7554/eLife.72833 (PMC8577847; doi:10.7554/eLife.72833)
Supplement: Figure 6—source data 2. [file elife-72833-fig6-data2.xlsx]

## Sheet: data
WT+pRS416	bud14Δ+pRS416	bud14Δ+BUD14
3649.12	11647.4	6551.51
5029.23	14625.6	8390.81
4353.51	8783.97	11122.7
3737.29	7172.6	8602.78
2223.4	1475.36	6760.23
3371.8	10482.2	3412.83
4250.98	8001.09	5278.19
2672.76	14662.8	11657.5
3197.06	8192.55	5339.67
5580.33	8981.35	6942.28
7702.09	5608.77	3532.63
3568.27	11838.1	8967.07
4472.2	8528.55	5075.66
3394.07	11071.7	4916.65
7285.24	3693.01	2698.2
3863.17	5305.99	5505.66
6354.24	3137.21	7494.9
5581.13	3982.91	7274.83
4935.77	8496.51	5021.09
5551.54	8363.76	7184.44
3715.95	7944.66	6221.97
5319.52	12154.2	4058.46
6911.64	3923.26	5398.59
4101.12	13757.6	8123.06
5773.73	7199.88	6570.77
8337.34	5837.55	4823.95
5007.32	4274.61	8779.1
3092.05	5248.53	4914.59
5027.3	7434.34	2561.92
4621	14808.7	4408.12
6128.68	5704.14	3721.87
1272.19	9068.95	7090
6122.52	17637.1	4397.51
4539.62	5516.57	2861.01
1996.19	11664.5	5227.16
3439.54	5985.18	3018.36
4807.51	11369.4	7513.87
4404.86	10924.1	5410.11
5193.86	12814.7	6454.32
7810.63	7683.24	2413.65
4311.32	14495.8	9086.58
2883.16	6599.13	2016.97
3892.37	6682.49	2384.34
3530.81	6897.62	3748.72
6976.77	11820.4	5100.95
6407.2	6992.49	2141.54
5388.32	5277.57	6060.86
2011.81	11369	3013.94
6025.83	8048.96	2482.66
3505.35	5669.38	2750.44
6024.21	3821.98	3833.45
6274.15	9118.6	3723.38
3502.23	11255.8	3069.37
1541.88	13423	4056.37
5877.84	6234.03	6774.45
6082.89	6689.18	5343.66
4035.73	9769.62	5512.54
5681.82	9661.2	5374.64
4171.72	4571.21	4856.08
3608.37	7067.03	3554.55
3364.92	7624.11	4538.72
3402.01	8938.64	6089.35
2769.26	4516.94	4578.18
2086.25	11359.4	5229.53
2897.78	5999.95	8814.12
2951.73	9257.55	4013.99
2224.85	6252.73	3829.05
11910.8	7518.98	5476.53
5032.92	5281.47	7214.12
3469.13	8612.74	3721.92
5905.13	4556.47	4434.44
3888.41	6568.13	7289.28
7678.17	4875.63	5220.21
2078.33	7440.1	4896.88
3279.26	11335.1	7329.86
4080.17	6803.27	2995.35
4420.5	3572.89	3542.86
7376.25	5021.45	4139.28
6642.54	3493.58	4547.19
7309.16	4590.71	4809.34
8610.4	8121.41	4520.69
5669.65	4527.97	3121.43
6745.17	5866.39	3939.56
4318.63	3799.56	3467.84
4998.34	6764.65	3020.93
4465.66	5234.7	3630.77
5408.43	3908.25	4431.17
3683.67		3502.69
3498.87		2877.71
5241.23		4255.82
4502.24		2813.69
4906.54		4773.84
6923.13
4543.66
8284.89
4806.56
4144.14
4625.14
3124.05
4225.13
7082.17
1870.81
5642.11
5588.44
4081.11
5985.52
4768.13
3991.69
3977.02
2836.18
5550.73
602.432
4171.37
3974.73
5339.32
3278.81
2817.22
3685.16
3757.67
3074.57
3171.05
1380.28
4212.73

## Sheet: One way Anova
Number of families	1
Number of comparisons per family	3
Alpha	0.05
Uncorrected Fisher's LSD	Mean Diff,	95,00% CI of diff,	Below threshold?	Summary	Individual P Value
WT+pRS416 vs. bud14Δ+pRS416	-3237	-3886 to -2588	Yes	****	<0,0001	B-C
WT+pRS416 vs. bud14Δ+BUD14	-477.8	-1116 to 160,7	No	ns	0.1419	B-D
bud14Δ+pRS416 vs. bud14Δ+BUD14	2759	2067 to 3452	Yes	****	<0,0001	C-D
Test details	Mean 1	Mean 2	Mean Diff,	SE of diff,	n1	n2	t	DF
WT+pRS416 vs. bud14Δ+pRS416	4605	7843	-3237	329.7	123	87	9.818	299
WT+pRS416 vs. bud14Δ+BUD14	4605	5083	-477.8	324.4	123	92	1.473	299
bud14Δ+pRS416 vs. bud14Δ+BUD14	7843	5083	2759	352	87	92	7.839	299
