# Supplementary material for: Protein phosphatase 1 in association with Bud14 inhibits mitotic exit in Saccharomyces cerevisiae
Source: eLife. 2021 Oct 11;10:e72833. doi: 10.7554/eLife.72833 (PMC8577847; doi:10.7554/eLife.72833)
Supplement: Figure 6—source data 3. [file elife-72833-fig6-data3.xlsx]

## Sheet: Data
bud14Δ+empty	bud14Δ+BUD14	bud14Δ+BUD14-F379A
13168.9	10509.5	6334.23
12780.5	11174	11430.6
8891	5004.3	6540.8
11691.9	6479.43	13219.5
8223.82	6602.8	7678.05
7510.11	9324	7983.49
5241.62	7362.88	9482.59
7137.57	8790.26	5400.94
11369.3	7071.05	8384.31
16566.6	6109.01	7516.9
12331.2	5623.75	12857.1
13905	6560	11203.8
8811.81	6459.5	10593
11415.8	9414.84	8645.77
10137.3	14000.4	9753.26
17692.1	5866.07	8589.95
11056.1	8057.51	8559.02
9191.1	11021.1	9851.98
7404.36	8122.85	9865.11
16829.5	3399.68	7133.83
12452.6	5204.6	12958.6
10347.9	7802.01	7836.35
9158.89	6982.19	8440.35
13736.4	12737.3	9024.44
5431.51	6975.23	17363.9
9620.37	6865.63	8554.28
10789.3	5562.94	6162.42
17657.2	13530.5	15067
8152.75	7844.58	11303.5
9653.16	6533.32	8919.39
10275.7	11278.3	5792.33
14573.9	6061.25	8483.08
11453.7	10121.7	7894.24
12614.6	8330.87	6645.62
13174.2	3983.69	14582.8
7421.92	9190.77	11423.2
11147	8517.97	6016.37
8459.65	10489.1	8427.48
8087.69	5551.85	5733.46
9446.45	7086.37	11131.4
6967.35	9076.28	9818.66
7343.97	13291.5	9150
11606.1	7794.43	13216.5
7027.1	8734.37	9083.9
11997.6	6092.17	6914.85
10736.8	4656.83	15357
	12799.9	7868.27
		13269.1
		12869.2
		12824.3
		8607.72
		10645
		8597.1
		6419.53

## Sheet: One way Anova
Number of families	1
Number of comparisons per family	3
Alpha	0.05
Uncorrected Fisher's LSD	Mean Diff,	95,00% CI of diff,	Below threshold?	Summary	Individual P Value
bud14Δ+empty vs. bud14Δ+BUD14	2581	1433 to 3729	Yes	****	<0,0001	A-B
bud14Δ+empty vs. bud14Δ+BUD14-F379A	1085	-25,46 to 2196	No	ns	0.0554	A-C
bud14Δ+BUD14 vs. bud14Δ+BUD14-F379A	-1496	-2600 to -391,6	Yes	**	0.0083	B-C
Test details	Mean 1	Mean 2	Mean Diff,	SE of diff,	n1	n2	t	DF
bud14Δ+empty vs. bud14Δ+BUD14	10667	8086	2581	580.8	46	47	4.444	144
bud14Δ+empty vs. bud14Δ+BUD14-F379A	10667	9582	1085	561.9	46	54	1.931	144
bud14Δ+BUD14 vs. bud14Δ+BUD14-F379A	8086	9582	-1496	558.7	47	54	2.677	144
