# Supplementary material for: Protein phosphatase 1 in association with Bud14 inhibits mitotic exit in Saccharomyces cerevisiae
Source: eLife. 2021 Oct 11;10:e72833. doi: 10.7554/eLife.72833 (PMC8577847; doi:10.7554/eLife.72833)
Supplement: Figure 6—source data 4. [file elife-72833-fig6-data4.xlsx]

## Sheet: data
SPB2/SPB1
Normal			Misaligned
WT	kin4Δ	bud14Δ	WT	kin4Δ	bud14Δ
6,44982923095042;	1.745	1.73135	1.25858	1.80565	4.23399
4.19337	1.40704	2.03728	1.06921	2.45148	3.47414
3.86221	2.26262	1.09358	1.56963	2.06639	1.75237
2.34163	2.18519	1.80904	1.58863	2.07653	2.31577
5.34874	2.40767	4.28575	1.19692	3.17133	1.98309
1.89949	2.69774	5.07564	2.42751	2.42953	1.85064
1.9985	1.73506	0.990955	2.22009	4.95643	2.20513
3.66984	2.53943	2.87441	1.52314	1.74498	4.5921
1.32088	1.7193	2.79553	1.11304	1.12919	1.07582
1.87046	5.31593	3.3726	1.01741	2.01023	1.76477
1.43542	4.61024	1.70426	3.70823	1.06898	1.20957
1.50326	1.66547	1.28295	1.04286	1.68647	3.13084
3.63358	2.19188	7.68283	1.05356	2.39548	2.68029
1.40781	5.80429	2.13174	1.1257	1.86758	1.19377
6.11932	1.73837	2.91851	1.19248	1.26311	2.27952
1.33245	2.59314	1.02794	1.75037	1.55248	3.65128
1.95431	2.55743	3.95365	1.0517	1.82219	2.22162
1.04642	1.35936	4.0114	1.78112	2.52932	1.4125
1.52309	2.63408	2.17711	1.86606	1.93115	1.03704
1.80804	3.64674	1.31421	1.01856	1.07774	1.19408
3.57695	1.23783	2.12614	1.12629	3.61569	1.24022
2.38391	2.08747	4.36712	1.34287	1.42539	1.02443
1.87024	1.38126	2.33519	1.24134	2.89248	1.35472
2.46685	2.60346	5.708	1.27257	1.10664	7.48598
1.4906	6.82391	5.01431	1.62289	2.83904	1.33383
2.59931	2.98172	7.13459	3.08971	2.09552	4.24296
2.13056	1.73252	5.62869	1.78721	3.32814	2.85664
1.24202	1.43446	4.03092	1.17184	2.62513	1.59371
2.71063	1.33928	3.26569	1.03396	2.29574	1.22424
2.49007	1.38477	1.11154	1.90151	1.65775	4.44654
3.55831	1.51325	2.29728	1.29539	2.17703	1.24627
1.94418	1.82013	2.39161	1.81529	1.60668	3.56632
1.37269	2.65301	1.64207	1.48441	1.80336	1.25338
2.31345	2.29452	3.87664	1.48953	3.30375	1.12012
1.75265	4.2483	3.0482	1.43966	2.96191	1.91673
2.43731	1.71761	5.18153	1.80811	4.87768	2.57864
2.35359	1.25864	5.38813	1.58539	2.40711	1.52266
2.32889	2.69245	6.01091	1.31547	2.03585	1.35134
3.13151	3.54177	2.97439	1.54596	1.36939	4.48767
1.92161	2.23168	4.59257	1.70213	1.25864	1.46476
1.56873	1.87093	2.47901	1.23984	1.85883	1.33866
3.05683	1.25218	3.16003	2.14614	1.41215	3.1757
3.90447	1.19278	3.97572		2.14096
1.54939	4.63	1.5991		6.45422
1.97554	1.71128	4.48651		1.74233
1.54672	1.23241	3.62305		3.26224
2.47712	1.27151	3.24565		2.95158
1.42119	1.88629	1.87918		2.53049
2.61703	2.6518	3.44002		1.3909
4.11958		2.69059		1.95988
1.63427		4.24435		1.30481
4.02382		1.90354		4.12228
1.26605		5.68135		1.16232
1.5174		2.40803		1.38033
1.31862		2.83449		1.26014
2.176		4.48767		1.27904
2.29129		3.57367		1.26876
		1.12003		4.95497
		1.83322		1.73254
		5.1988		1.21603
				1.34524
				2.13731
				5.49302
				1.17403

## Sheet: one way anova
Number of families	1
Number of comparisons per family	15
Alpha	0.05
Uncorrected Fisher's LSD	Mean Diff,	95,00% CI of diff,	Below threshold?	Summary	Individual P Value
WT Normal vs. kin4∆ Normal	0.01326	-0,5702 to 0,5967	No	ns	0.9644	A-B
WT Normal vs. bud14∆ Normal	-1.004	-1,559 to -0,4490	Yes	***	0.0004	A-C
WT Normal vs. WT Misaligned	0.8947	0,2824 to 1,507	Yes	**	0.0043	A-D
WT Normal vs. kin4∆ Misaligned	0.1623	-0,3841 to 0,7087	No	ns	0.5594	A-E
WT Normal vs. bud14∆ Misaligned	-0.1402	-0,7485 to 0,4680	No	ns	0.6504	A-F
kin4∆ Normal vs. bud14∆ Normal	-1.017	-1,591 to -0,4426	Yes	***	0.0006	B-C
kin4∆ Normal vs. WT Misaligned	0.8815	0,2512 to 1,512	Yes	**	0.0063	B-D
kin4∆ Normal vs. kin4∆ Misaligned	0.149	-0,4174 to 0,7155	No	ns	0.605	B-E
kin4∆ Normal vs. bud14∆ Misaligned	-0.1535	-0,7798 to 0,4728	No	ns	0.63	B-F
bud14∆ Normal vs. WT Misaligned	1.899	1,295 to 2,502	Yes	****	<0,0001	C-D
bud14∆ Normal vs. kin4∆ Misaligned	1.166	0,6293 to 1,703	Yes	****	<0,0001	C-E
bud14∆ Normal vs. bud14∆ Misaligned	0.8635	0,2639 to 1,463	Yes	**	0.0049	C-F
WT Misaligned vs. kin4∆ Misaligned	-0.7324	-1,329 to -0,1363	Yes	*	0.0162	D-E
WT Misaligned vs. bud14∆ Misaligned	-1.035	-1,688 to -0,3817	Yes	**	0.002	D-F
kin4∆ Misaligned vs. bud14∆ Misaligned	-0.3025	-0,8945 to 0,2894	No	ns	0.3154	E-F
Test details	Mean 1	Mean 2	Mean Diff,	SE of diff,	n1	n2	t	DF
WT Normal vs. kin4∆ Normal	2.443	2.43	0.01326	0.2965	57	50	0.04471	312
WT Normal vs. bud14∆ Normal	2.443	3.447	-1.004	0.2819	57	61	3.56	312
WT Normal vs. WT Misaligned	2.443	1.548	0.8947	0.3112	57	42	2.875	312
WT Normal vs. kin4∆ Misaligned	2.443	2.281	0.1623	0.2777	57	65	0.5844	312
WT Normal vs. bud14∆ Misaligned	2.443	2.583	-0.1402	0.3091	57	43	0.4536	312
kin4∆ Normal vs. bud14∆ Normal	2.43	3.447	-1.017	0.292	50	61	3.483	312
kin4∆ Normal vs. WT Misaligned	2.43	1.548	0.8815	0.3203	50	42	2.752	312
kin4∆ Normal vs. kin4∆ Misaligned	2.43	2.281	0.149	0.2879	50	65	0.5177	312
kin4∆ Normal vs. bud14∆ Misaligned	2.43	2.583	-0.1535	0.3183	50	43	0.4822	312
bud14∆ Normal vs. WT Misaligned	3.447	1.548	1.899	0.3069	61	42	6.187	312
bud14∆ Normal vs. kin4∆ Misaligned	3.447	2.281	1.166	0.2728	61	65	4.274	312
bud14∆ Normal vs. bud14∆ Misaligned	3.447	2.583	0.8635	0.3047	61	43	2.834	312
WT Misaligned vs. kin4∆ Misaligned	1.548	2.281	-0.7324	0.303	42	65	2.417	312
WT Misaligned vs. bud14∆ Misaligned	1.548	2.583	-1.035	0.332	42	43	3.117	312
kin4∆ Misaligned vs. bud14∆ Misaligned	2.281	2.583	-0.3025	0.3008	65	43	1.006	312
